1 **The fading of the mpox outbreak among men who have sex with**  
2 **men: a mathematical modelling study**

3

4 **Maria Xiridou<sup>1</sup>, Fuminari Miura<sup>1,2</sup>, Philippe Adam<sup>3,4</sup>, Eline Op de Coul<sup>1</sup>, John de Wit<sup>3,5</sup>,**  
5 **Jacco Wallinga<sup>1,6</sup>**

6

7 <sup>1</sup> *Centre for Infectious Disease Control, National Institute of Public Health and the*  
8 *Environment, Bilthoven, the Netherlands*

9 <sup>2</sup> *Center for Marine Environmental Studies, Ehime University, Ehime, Japan*

10 <sup>3</sup> *Centre for Social Research in Health, UNSW Sydney, Sydney, NSW, Australia*

11 <sup>4</sup> *Institute for Prevention and Social Research, Utrecht, the Netherlands*

12 <sup>5</sup> *Interdisciplinary Social Science, Utrecht University, Utrecht, the Netherlands*

13 <sup>6</sup> *Department of Biomedical Data Sciences, Leiden University Medical Center (LUMC),*  
14 *Leiden, the Netherlands*

15

16 **Corresponding author:** Maria Xiridou, Centre for Infectious Diseases Control, Department  
17 of Epidemiology and Surveillance, National Institute of Public Health and the Environment,  
18 PO Box 1, 3720 BA Bilthoven, The Netherlands. Tel: +31629642155. Email:  
19 [maria.xiridou@rivm.nl](mailto:maria.xiridou@rivm.nl).

20

21 **Short title:** Modelling mpox (monkeypox) among MSM.

22

23 **Keywords:** monkeypox, mpox, men who have sex with men, MSM, mathematical model,

24 **NOTE:** This preprint reports new research that has not been certified by peer review and should not be used to guide clinical practice.  
immunity, vaccination, sexual behaviour.

25 **Author contributions:** Conceptualisation, study design: MX, JW, PA, FM. Data curation,  
26 data collection: PA, JdW. Data analyses: MX, PA, FM, EOdc, JdW. Model development and  
27 analyses: MX. Literature search: MX, FM, PA, EOdc. Scenario investigation, interpretation,  
28 writing: all authors.

29  
30 **Availability of data and materials:** The data for the numbers of daily mpox cases in the  
31 Netherlands described in this study can be freely and openly accessed on the website of the  
32 National Institute of Public Health and the Environment (RIVM) of the Netherlands:  
33 <https://www.rivm.nl/en/mpox>. The data from the “COVID-19, Sex, and Intimacy Survey” and  
34 the survey “Monkeypox: a new challenge for your sex life” are third party data and are not  
35 freely available; enquiries for data access can be addressed to Prof. J. de Wit. Description of  
36 data from the “COVID-19, Sex, and Intimacy Survey” have been published in Xiridou et al.  
37 *Sex Transm Diseases* 2020; 49:145-153. The code for the model analyses is available at  
38 <https://github.com/rivm-syso/fadingmpoxoutbreak>.

39  
40  
41 **Counts:** Text: 3,472/3,500 words; abstract, 200/200 words; inserts: 7/7 tables or figures  
42 (4panels max); 35/50 references.

43  
44 **Short summary:** Modelling study shows that the decline in mpox cases among MSM in the  
45 Netherlands was due to infection-induced immunity among those with high sexual activity  
46 levels, but was accelerated by behavioural adaptations. The outbreak could have faded even  
47 without vaccination.

48 **ABSTRACT**

49

50 **Background**

51 In the Netherlands, the number of mpox cases started declining before mpox vaccination was  
52 initiated. Most cases were men who have sex with men (MSM). We investigated whether the  
53 decline in mpox could be attributed to infection-induced immunity or behavioural adaptations.

54

55 **Methods**

56 We developed a transmission model and accounted for possible behavioural adaptations: less  
57 casual partners and shorter time until MSM with mpox refrain from sexual contacts.

58

59 **Results**

60 Without behavioural adaptations, the peak in modelled cases matched observations, but the  
61 decline was less steep than observed. With behavioural adaptations in the model, we found a  
62 decline of 16-18% in numbers of casual partners in June and 13-22% in July 2022. Model  
63 results showed a halving of the infectious period before refraining from sex. When  
64 vaccination started, 57% of MSM with very high sexual activity in the model had been  
65 infected. Model scenarios revealed that the outbreak could have waned by November 2022  
66 even without vaccination.

67

68 **Conclusions**

69 The limited duration of the mpox outbreak in the Netherlands can be ascribed to infection-  
70 induced immunity among MSM with high sexual activity levels. The subsequent decline was  
71 accelerated by behavioural adaptations. Immunity among those most sexually active is  
72 essential to impede mpox resurgence.

## 73 **Introduction**

74 Mpox (formerly known as monkeypox) is a zoonotic disease caused by the monkeypox virus  
75 (MPXV) [1]. In May-July 2022, mpox outbreaks were reported, mostly among men who have  
76 sex with men (MSM) [2, 3]. The number of cases peaked within 2-3 months in most countries  
77 and then declined [2]. Several factors may have contributed to the abrupt decline, including  
78 increased immunity due to MPXV infection, increased awareness and behavioural adaptations  
79 in the affected population, and public health interventions [3-5].

80 In the Netherlands, the first mpox diagnosis was on 20 May 2022. The number of mpox cases  
81 increased sharply in June 2022, but started declining in the second week of July 2022 [6],  
82 about two weeks before the start of the national mpox vaccination programme, on 25 July  
83 2022 [7]. In May and June 2022, there was large media coverage of the mpox outbreak and  
84 that raised awareness of a new threat among MSM. In the second half of June 2022, health  
85 communication messages about mpox were disseminated in the media [7, 8]. Information  
86 campaigns about mpox were also undertaken in commercial sex venues, such as gay bars,  
87 sauna's, sex clubs, and at festivals [7]. Also, it was recommended to refrain from sexual or  
88 physical contacts when mpox was suspected or diagnosed [9]. In an online survey carried out  
89 in August 2022, many participants reported to be willing to refrain from close physical and  
90 sexual contacts in case of MPXV infection, that they had reduced their number of sexual  
91 partners since the start of the outbreak, and they avoided visits to gay sex venues [9]. These  
92 reports were consistent with the fact that sex venues and parties in Amsterdam experienced a  
93 considerable drop in numbers of visitors in July 2022 [10].

94 We assessed the contribution of different factors that may have led to the decline in the  
95 number of mpox cases observed in the Netherlands before the start of the mpox vaccination  
96 programme. We developed a mathematical model that describes the transmission of MPXV  
97 via sexual or intimate contacts among MSM and fitted the model to numbers of mpox cases

98 in the Netherlands until 25 July 2022, when the mpox vaccination programme started. To  
99 disentangle the impact of immunity due to infection and the impact of behavioural adaptations  
100 from the impact of vaccination in shaping the course of the outbreak, we examined also model  
101 scenarios without the vaccination programme until the end of 2022.

102

103

## 104 **Methods**

105

### 106 *The transmission model*

107 We developed a deterministic compartmental model that describes MPXV transmission  
108 among MSM (Figure 1). The model parameters are defined in Tables 1-3. We accounted only  
109 for transmission via sexual or intimate contacts with either main regular sex partners or casual  
110 sex partners, a distinction that follows earlier modelling of sexual relationships [11-13]. In  
111 this paper, the notion of “main regular sex partner” refers to a person with whom an  
112 individual engages in regular or ongoing sexual activity, typically (but not exclusively) within  
113 a committed relationship. Other relationships involving sexual contacts are referred to as  
114 casual partnerships in this study. Considering sexual or intimate contacts sufficient for MPXV  
115 transmission, for simplicity, we assumed one such contact per casual partner. In the model,  
116 MSM were divided into four groups, based on level of sexual activity, that was measured in  
117 terms of the total number of sex partners men have: very low, fairly low, fairly high, and very  
118 high sexual activity (Table 2).

119

120

121 *The course of mpox infection*

122 After infection, individuals are initially exposed but not yet infectious; later, they become  
123 infectious, but may not (yet) have symptoms [14, 15]. In the model, we assumed that  
124 infectious individuals may start refraining from sexual or intimate contacts a few days after  
125 becoming infectious, when they have symptoms or test positive for MPXV [15, 16]. MSM  
126 refraining from sexual/intimate contacts can still transmit MPXV (due to imperfect adherence  
127 or because they refrain only from specific types of contacts), but with a lower probability,  
128 compared to those not refraining from sexual/intimate contacts [16]. Most mpox cases recover  
129 after a few weeks and become immune [17].

130

131 *Vaccinated MSM*

132 Smallpox vaccination was ended in the Netherlands in 1974. Based on the fraction of the male  
133 population 17-66 years old in the Netherlands being born before 1974, in the model we  
134 assumed that 25% of MSM in 2022 were vaccinated in the past and that still offers some  
135 protection against mpox [7]. As we had no data to establish the percentage vaccinated in the  
136 past in each sexual activity group separately, we assumed the same percentage (25%) in all  
137 activity groups. The importance of this assumption was examined in sensitivity analyses (see  
138 paragraph below). From the second week of June 2022, close contacts of individuals  
139 diagnosed with mpox were offered vaccination with a single dose of Imvanex®. To account  
140 for these vaccinations, we included in the model a small vaccination rate from 8 June 2022  
141 onwards among those with the highest level of sexual activity.

142

143

144

145 *Data*

146 We used data on the daily numbers of mpox cases from the national surveillance system for  
147 notifiable infectious diseases [7]. The numbers of confirmed mpox cases were ordered  
148 according to date of symptom onset, throughout the analyses presented in this study. The  
149 earliest date of symptom onset among confirmed mpox cases in the Netherlands was 27 April  
150 2022.

151

152 *Possible behavioural adaptations*

153 We examined two possible adaptations: (1) MSM starting earlier to refrain from sexual  
154 contacts, thus resulting in shorter duration of the infectious period while not refraining from  
155 sex and (2) a decline in the number of casual partners [7]. We investigated scenarios with  
156 these behavioural adaptations taking place (a) only in July 2022 or (b) in June and in July  
157 2022 [9, 10]. The magnitude and timing of the adaptations were obtained from the fitting  
158 process.

159

160 *Model fitting*

161 The model was calibrated to the number of mpox cases using a Bayesian approach. We  
162 defined uniform prior distributions for the uncertain parameters (Table 1) and sampled 10,000  
163 combinations of parameter values. In a first step, we started the model calculations with three  
164 infectious unvaccinated cases in the subgroup with very high sexual activity level. With each  
165 combination of parameter values, we computed the daily number of mpox cases and its  
166 Poisson likelihood up to 5 July 2022, for the scenarios with adaptations only in July 2022  
167 (and up to 17 June 2022, for the scenarios with adaptations in June and July 2022) – Table 3  
168 shows parameters relating to the behavioural adaptations. This provided us the posterior

169 distributions of all uncertain parameters except those relating to the behavioural adaptations  
170 that occurred in June/July 2022. In a second step, we used the posterior distributions obtained  
171 from the first step and fitted the model to data for the remaining days until 25 July 2022. The  
172 prior distributions of the parameters in the first and the second step are shown in Tables 1 and  
173 3, respectively. The posterior distributions are shown in Tables S1-S3 in the Supplement.

174

### 175 *Sensitivity analyses*

176 Based on the size of the male population 17-66 years old [18] and available data on the  
177 prevalence of same-sex behaviour [19], we assumed that the number of MSM in 2022 was  
178 250,000. Due to uncertainty in those estimates, we repeated the analyses with a population  
179 size of 200,000 or 300,000 MSM. Also, we carried out sensitivity analyses for the fraction of  
180 the population that had been vaccinated before 1974 via the old smallpox vaccination  
181 programme. In our main results, we assumed that 25% of the current MSM population had  
182 been vaccinated in the past. We examined also two scenarios where (a) the percentage  
183 vaccinated in the past was higher among those with higher levels of sexual activity: 23%,  
184 25%, 30%, 40% vaccinated in the group with very low, fairly low, fairly high, or very high  
185 level of sexual activity, respectively; and (b) the percentage vaccinated in the past was higher  
186 among those with lower levels of sexual activity: 29%, 25%, 15%, 10% vaccinated in the  
187 group with very low, fairly low, fairly high, or very high level of sexual activity, respectively.  
188 These percentages were chosen in such a way that in the overall MSM population 25% was  
189 vaccinated in the past.

190

191

192



193 *Hypothetical scenarios for the course of the outbreak without vaccination*

194 Earlier work has indicated that the mpox outbreaks could fade out within a few months even  
195 without vaccination or other major interventions [4, 5, 12, 20]. To investigate this for the  
196 mpox outbreak in the Netherlands, we examined hypothetical scenarios for the course of the  
197 mpox outbreak until the end of 2022, without the mpox vaccination programme.

198 We undertook model calculations until 31 December 2022 for the following scenarios: (a)  
199 without behavioural adaptations and (b) with behavioural adaptations in July 2022. For both  
200 scenarios, the parameter values were those obtained via the fitting process using data up to 25  
201 July 2022. Also, we investigated whether new introductions of mpox cases could elicit a  
202 resurgence in mpox. For the scenario with behavioural adaptations in July 2022, we examined  
203 two scenarios with import of unvaccinated infectious mpox cases into the group with very  
204 high sexual activity level: (a) import of 20 cases on 1 November 2022 or (b) import of 1 case  
205 per day from 1 November until 31 December 2022.

206

207

208 **Results**

209

210 *The decline in the mpox outbreak with and without behavioural adaptations*

211 Without behavioural adaptations in the model, the daily number of mpox cases among MSM  
212 started declining around 8 July 2022, but the decline was less steep than observed (Figure 2a).  
213 The epidemic curve in the overall MSM population paralleled the epidemic curve in the group  
214 with very high sexual activity level (Figure 2b). Allowing for behavioural adaptations in July  
215 2022, we found a decline of 13% (95% credible interval (CrI), 1-28%), 15% (95% CrI, 1-  
216 29%), and 24% (95% CrI, 1-30%) in numbers of casual partners of MSM with low, fairly

217 high, and very high sexual activity, respectively, compared to before the mpox outbreak  
218 (Table S1 in Supplement). The infectious period while not refraining from sexual contacts  
219 was reduced from 6.0 days (95% CrI, 4.4-7.8 days) in May-June 2022 to 2.6 days (95% CrI,  
220 2.0-4.3 days) in July 2022. The timing of these behavioural adaptations was calculated from  
221 the model at 7 July 2022 and there was a rather sharp decline in the number of cases thereafter  
222 (Table S1 and Figure 2c). With behavioural adaptations in June and July 2022, we found that  
223 the numbers of casual partners of MSM with low, fairly high, and very high sexual activity  
224 were reduced by 17%, 16%, and 18%, respectively, in June; and by 13%, 18%, and 22%,  
225 respectively, in July (Table S1). The infectious period while not refraining from sexual  
226 contacts was 6.9 days in May, 5.6 days in June, and 2.4 days in July 2022 (Table S1). The  
227 adaptations occurred as of 21 June and 10 July 2022 (Table S1 and Figure 2d).

228

#### 229 *Distribution of mpox cases according to level of sexual activity*

230 By 25 July 2022, 64% of mpox cases were MSM with very high and 18% with fairly high  
231 levels of sexual activity (Figure 3a,b). At that point, 57% (95% CrI, 33-66%) of the group  
232 with a very high sexual activity level had been infected with MPXV (Figure 3c), but only  
233 1.1% (95% CrI, 0.9-1.3%) of the overall MSM population. Of all MPXV infections in the  
234 model until 25 July 2022, the infecting partner was a man with very high, fairly high, fairly  
235 low, or very low sexual activity in 76.7%, 18.7%, 3.9%, and 0.7% of infections, respectively  
236 (Figure 3d).

237

#### 238 *Sensitivity analyses for the size of the MSM population*

239 With a smaller population of 200,000 MSM (Figure S2, Table S2), the modelled decline in  
240 the daily number of cases started earlier and the number of cases in the very high sexual

241 activity group was lower than in the scenario with 250,000 MSM. In a larger population of  
242 300,000 MSM, the outbreak without behavioural adaptations would have been more severe  
243 than what we observed in the data (Figure S3, Table S2). The number of mpox cases in the  
244 model started declining around 20 July 2022, about ten days later than observed (Figure S3a).  
245 The fraction of the group with very high sexual activity level that had been infected with  
246 MPXV by 25 July 2022 was 66% in a population of 200,000 MSM and 45% in a population  
247 of 300,000 MSM (Figure 3c).

248 With different percentages of MSM vaccinated in the past across the different sexual activity  
249 groups, the results were similar (Figure S4, Table S3). The transmission probability per sexual  
250 act was estimated at 0.60 (95% CrI, 0.47-0.80) with higher percentage vaccinated among  
251 those with higher numbers of sex partners (Table S3); 0.42 (95% CrI, 0.32-0.68), with higher  
252 percentage vaccinated among those with lower numbers of sex partners (Table S3); and 0.48  
253 (95% CrI, 0.39-0.81), in the scenario with the same percentage vaccinated in all activity  
254 groups (Table S1).

255

### 256 *Hypothetical scenarios for the course of the outbreak without vaccination*

257 Figure 4 shows the daily numbers of mpox cases from the model and from data until 31  
258 December 2022. Without behavioural adaptations in 2022, the outbreak would have faded out  
259 by December 2022 in 90% of the modelled outcomes (Figure 4a and S5). With behavioural  
260 adaptations in July 2022, the outbreak would have faded out by November 2022 (Figure 5b).  
261 Import of unvaccinated infectious MSM with very high level of sexual activity resulted in a  
262 small increase in mpox cases. With import of 20 cases on 1 November 2022, we found 41  
263 (95% CrI, 30-106) additional mpox cases (Figure 4c); with import of one case per day from 1

264 November to 31 December 2022, we found 81 (95% CrI, 63-211) additional cases (Figure  
265 4d), compared to the scenario without import.

266

267

## 268 **Discussion**

269 We developed a transmission model of the mpox outbreak among MSM and fitted this model  
270 to the daily numbers of mpox notifications in the Netherlands. We demonstrated that  
271 depletion of susceptibles among MSM with very high levels of sexual activity may have  
272 limited further growth of the mpox epidemic, but could not solely account for the rapid  
273 decline after the peak. This suggests that behavioural adaptations may have accelerated the  
274 decrease in mpox cases. Furthermore, our findings suggest that, even without the mpox  
275 vaccination programme, the level of immunity due to infection among MSM with a very high  
276 level of sexual activity was sufficiently high to lead to the fading out of the outbreak by  
277 November 2022.

278 The major strength of our study is that we quantified the contribution of infection-induced  
279 immunity and the contribution of behavioural adaptations in shaping the outbreak. The model,  
280 informed by the daily numbers of registered mpox cases during the rise and the decline of the  
281 mpox outbreak, allowed us to explore counterfactual situations and to show that the outbreak  
282 could have waned by the end of 2022 even without mpox vaccination or behavioural  
283 adaptations.

284 We incorporated heterogeneity in sexual activity by dividing the population into groups with  
285 different levels of sexual activity and captured the assortative mixing of highly active  
286 individuals that is characteristic of sexual contact networks. This modelling approach has the  
287 advantage of being well established, validated, and extensively studied in the past four

288 decades in the context of several sexually transmitted infections [21-24]. Other modelling  
289 approaches, such as stochastic networks and individual-based models, allow for a more  
290 detailed simulation of the initial and final phase of the outbreak, with very few infections, but  
291 at the cost of parsimony and transparency.

292 Our study is in agreement with the theory developed via earlier studies. Heterogeneity in the  
293 number of sexual partners and assortative mixing may enhance the selective spread of  
294 infection among individuals with higher sexual activity; individuals with higher activity levels  
295 are more likely to get infected earlier in the course of the outbreak (see [21, 22] and  
296 references herein). Our findings also agree with previous studies on MPXV transmission  
297 showing that a very small group of MSM with high level of sexual activity can be sufficient  
298 to cause large outbreaks in very short time [12, 20] and a decline in numbers of casual  
299 partners could reduce the epidemic size of mpox [4, 12]. Our results correspond well also  
300 with a study that showed how the observed decline in mpox cases could be primarily  
301 attributed to infection-induced immunity [5]. The present study extends earlier findings as our  
302 results quantify the contribution of infection-induced immunity and the contribution of  
303 behavioural adaptations and reveal how these factors shaped the outbreak. In contrast with  
304 other studies projecting smaller outbreaks [25] or more severe and longer-lasting outbreaks  
305 [4, 12, 13], we found that the size of the mpox outbreak was large but self-limited and could  
306 have died out within a few months even without behavioural adaptations or vaccination.

307 We showed that, without behavioural adaptations, the decline in mpox cases in a larger  
308 population of 300,000 MSM started later than what we observed in the data. This suggests  
309 that the observed decline could have been possible only with behavioural adaptations. Our  
310 results suggest that a reduction in numbers of sexual partners considerably expedited the  
311 decline in mpox cases. MSM may have started changing their behaviour with the first news of  
312 mpox in the general media and the mpox campaigns that were conducted in gay sex venues

313 and media [10, 26] possibly contributed to strengthen the early behavioural adaptations and to  
314 develop rational and evidence-based risk reduction strategies to mitigate MPXV transmission.  
315 This demonstrates the importance of accurate and timely communication with populations at  
316 risk .and is essential for public health response, since similar outbreaks could occur with other  
317 pathogens when introduced into subpopulations with sufficiently high contact levels. The  
318 mpox vaccination programme possibly accelerated the impact of awareness and behavioural  
319 adaptations and offered protection against mpox at the individual level. Vaccination also  
320 reduced the risk of resurgence of mpox, since it enhanced immunity at the population level.  
321 Our model can be used to investigate the impact of vaccination and how vaccination can be  
322 employed in the long run for some subgroups of MSM. Furthermore, our model could be  
323 extended to account for transitioning across sexual activity groups.

324 Our study has important implications for the prevention of mpox outbreaks in the future.  
325 Prevention can be achieved by maintaining a high level of immunity among those with the  
326 highest sexual activity level. First, it should be taken into account that this is not a closed  
327 fixed group and there may be changes in its consistency over long time periods. For example,  
328 MSM with low levels of sexual activity who did not receive vaccination in 2022 might  
329 become more sexually active and replenish the pool of susceptible MSM with high level of  
330 sexual activity [22], thus making a new mpox outbreak possible. Second, in assessing the  
331 effectiveness of public health messages, it is important to consider the venues that the target  
332 group might visit. Having sex in sex clubs and parties has been identified as an independent  
333 predictor of MPXV infection [9]. Third, sexual mixing according to age is assortative. The  
334 protection from the smallpox vaccine in our analyses is overestimated for MSM less than 45  
335 years and underestimated for MSM older than 45 years. For the current study this has a  
336 limited impact, but for future prevention of mpox outbreaks it is important to include the  
337 changing distribution of immunity with age. Furthermore, caution is needed when

338 extrapolating our results to other populations. We allowed for only limited behavioural  
339 changes. With the high transmission potential of MPXV, it is possible that with less  
340 assortative sexual mixing, the virus could have spread faster among the groups of MSM with  
341 low sexual activity levels. In that case, infection-induced immunity within the group with  
342 very high sexual activity level might have increased slower than in our analyses, making  
343 persistence more likely. Then fading of the outbreak would not have been possible without  
344 major behavioural changes. However, this is unlikely for the mpox outbreak in the  
345 Netherlands, since monthly numbers of STI diagnoses, tests, and consultations were more or  
346 less stable throughout 2022 [27], therefore, we have no evidence of a major decline in  
347 numbers of sexual partners of MSM. Finally, recent reports point to the possibility of  
348 reinfections [28], but this was not accounted for in this study.

349 In conclusion, we demonstrated that depletion of susceptible MSM with high levels of sexual  
350 activity as well as behavioural adaptations accounted for the timing and speed of the decline  
351 in mpox cases among MSM in the Netherlands. The level of immunity due to infection within  
352 the subgroup of MSM with the highest level of sexual activity was build up so fast that the  
353 outbreak could have waned within a few months, even without interventions or behavioural  
354 adaptations. The risk of a resurgence of mpox in the short term seems very low, even with  
355 import of mpox infections.

356

357 **Acknowledgements:** The authors would like to thank Paul Zantkuijl (Soa Aids Nederland)  
358 for information on mpox messages in media and health promotion platforms for MSM in the  
359 Netherlands and for information about the reduction in visitors in clubs and sex venues in  
360 Amsterdam in July 2022. Anonymous club owners are also thanked for providing the above  
361 information. We express our gratitude to the participants, the research teams, and the  
362 organizations involved in the “COVID-19, Sex, and Intimacy Survey” and the survey  
363 “Monkeypox: a new challenge for your sex life” led by Philippe Adam and John de Wit. Both  
364 surveys were conducted in partnership between Utrecht University, the Institute for  
365 Prevention and Social Research (IPSR Utrecht), Soa Aids Nederland, and the National  
366 Institute of Public Health and Environment (RIVM). We thank the anonymous reviewers for  
367 providing comments and suggestions that substantially improved the paper.

368

369 **Conflicts of interest and funding:** The authors declare that no competing interests exist.  
370 Fuminary Miura acknowledges funding from Japan Society for the Promotion of Science  
371 (Number 20J00793). The funding source had no involvement in the analyses or interpretation  
372 of results.



373 **Figure legends**

374

375 **Figure 1.** Flow diagram of the model for monkeypox virus (MPXV) infections. Individuals in  
376 the model are divided into classes according to stage of mpox infection, vaccination status,  
377 and whether they are refraining from sexual contacts. Unvaccinated individuals can be  
378 susceptible to MPXV ( $S_{ui}$ ), exposed to MPXV ( $E_{ui}$ ), infectious not refraining from sexual  
379 contacts ( $I_{ui}$ ), or infectious but refraining from sexual contacts ( $Y_{ui}$ ). Individuals vaccinated in  
380 the past can be susceptible ( $S_{vi}$ ), exposed ( $E_{vi}$ ), infectious not refraining or refraining from  
381 sexual contacts ( $I_{vi}$ ,  $Y_{vi}$ ). Individuals vaccinated in 2022 can be susceptible ( $S_{pi}$ ), exposed  
382 ( $E_{pi}$ ), infectious not refraining or refraining from sexual contacts ( $I_{pi}$ ,  $Y_{pi}$ ). Infectious cases  
383 may need hospitalization ( $H_i$ ). After recovery, they are immune ( $R_i$ ). These classes are further  
384 divided into four subclasses according to level of sexual activity. In the model, we accounted  
385 for exit out of the population at a per capita rate  $\mu$  that is not shown in the diagram.

386

387 **Figure 2.** The daily number of mpox cases among MSM in the Netherlands from 27 April to  
388 25 July 2022. Black bullets show data from the national database of notifiable diseases of the  
389 Netherlands. All other results were calculated from the model. Mpox cases are shown  
390 according to date of symptom onset. The orange box-plots show the daily numbers of mpox  
391 cases in the overall MSM population: (a) without behavioural adaptations; (c) with  
392 behavioural adaptations only in July 2022; (d) with behavioural adaptations in June and July  
393 2022. (b) Median daily number of mpox cases in the overall MSM population (black line), in  
394 the groups with high sexual activity level (red lines), and in the groups with low sexual  
395 activity level (blue lines). In (c), (d), the vertical grey lines show medians (solid lines) and  
396 95% credible intervals (dashed lines) of the day at which the behavioural adaptations

397 occurred, as obtained from the model fitting. Model results were calculated in a population of  
398 250,000 MSM.

399

400 **Figure 3.** The role of subgroups of MSM with different levels of sexual activity, as calculated  
401 from the model, for the scenarios with behavioural adaptations in July 2022. (a) Distribution  
402 of cumulative mpox cases until 25 July 2022. (b) Distribution of daily mpox cases. (c) Percent  
403 of MSM with very high sexual activity being susceptible to monkeypox virus. (d) Distribution  
404 of new monkeypox virus infections among MSM according to the sexual activity group of the  
405 infecting individual. In (a), (c) results with population of 200,000; 250,000; or 300,000 MSM;  
406 in (b), (d) results with population of 250,000 MSM.

407

408 **Figure 4.** Daily number of mpox cases among MSM in the Netherlands from 27 April to 31  
409 December 2022. Black bullets show data obtained from the national database of notifiable  
410 infectious diseases of the Netherlands. Orange box-plots show medians and interquartile  
411 ranges calculated from the model in a population of 250,000 MSM. Vertical solid grey lines  
412 show the last day of each calendar month. (a) Without behavioural adaptations. (b) With  
413 behavioural adaptations in July 2022. (c) With behavioural adaptations in July 2022 and  
414 import of 20 unvaccinated infectious mpox cases into the group with very high level of sexual  
415 activity on 1 November 2022. (d) With behavioural adaptations in July 2022 and import of  
416 one infectious case per day (in the group with very high level of sexual activity) from 1  
417 November to 31 December 2022.

418

## 419 **References**

- 420 1. Fine PE, Jezek Z, Grab B, Dixon H. The transmission potential of monkeypox virus in human  
421 populations. *Int J Epidemiol.* 1988;17(3):643-50.
- 422 2. WHO. 2022 Mpox (monkeypox) outbreak: global trends, 13 December 2022. 2022. Accessed 28  
423 December 2022. Available from:  
424 [https://worldhealthorg.shinyapps.io/mpox\\_global/\\_w\\_77b7113a/#section-fns](https://worldhealthorg.shinyapps.io/mpox_global/_w_77b7113a/#section-fns).
- 425 3. European Centre for Disease Prevention and Control. Monkeypox multi-country outbreak - second  
426 update 18 October 2022. Accessed 28 December 2022. Available from:  
427 [https://www.ecdc.europa.eu/sites/default/files/documents/Monkeypox-multi-country-outbreak-](https://www.ecdc.europa.eu/sites/default/files/documents/Monkeypox-multi-country-outbreak-second-update.pdf)  
428 [second-update.pdf](https://www.ecdc.europa.eu/sites/default/files/documents/Monkeypox-multi-country-outbreak-second-update.pdf).
- 429 4. Brand SPC, Cavallaro M, Hilton J, Guzman-Rincon L, House T, Keeling MJ, et al. The role of  
430 vaccination and public awareness in medium-term forecasts of monkeypox incidence in the United  
431 Kingdom. medRxiv posted August 17, 2022.
- 432 5. Murayama H, Pearson CAB, Abbott S, Miura F, Jung S, Fearon E, et al. Accumulation of  
433 immunity in heavy-tailed sexual contact networks shapes monkeypox outbreak sizes. medRxiv  
434 posted November 15, 2022.
- 435 6. National Institute of Public Health and the Environment (RIVM). Monkeypox, 3 November 2022.  
436 Available from: <https://www.rivm.nl/en/monkeypox>.
- 437 7. van Ewijk C, Miura F, van Rijckevorsel G, de Vries H, Welkers M, van den Berg O, et al.  
438 Monkeypox outbreak in the Netherlands in 2022: public health response, epidemiological and  
439 clinical characteristics of the first 1000 cases and protection of the first-generation smallpox  
440 vaccine. *Euro Surveill.* 2023;28:2200772
- 441 8. Man Tot Man. Do this if you have monkeypox. Updated 19 July 2022. Available from:  
442 <https://www.mantotman.nl/en/do-this-if-you-have-monkeypox>.

- 443 9. Adam PCG, Op de Coul ELM, Bos H, Zantkuijl P, Zuilhof W, Xiridou M, et al. Monkeypox-  
444 related changes in behaviour among MSM in the Netherlands and their impact on the monkeypox  
445 outbreak: using behavioural research and theorising to inform the monkeypox response. Utrecht  
446 University and Institute for Prevention and Social Research, Utrecht, the Netherlands; 2022.
- 447 10. Soa Aids Nederland. Samenwerking zorg en horeca onmisbaar in aanpak monkeypox-uitbraak.  
448 Updated 6 October 2022. Available from: [https://www.soaids.nl/nl/professionals/  
449 actueel/nieuwsbericht/samenwerking-zorg-horeca-onmisbaar-in-aanpak-monkeypox-uitbraak](https://www.soaids.nl/nl/professionals/actueel/nieuwsbericht/samenwerking-zorg-horeca-onmisbaar-in-aanpak-monkeypox-uitbraak).
- 450 11. Jenness SM, Le Guillou A, Chandra C, Mann LM, Sanchez T, Westreich D, et al. Projected HIV  
451 and Bacterial Sexually Transmitted Infection Incidence Following COVID-19-Related Sexual  
452 Distancing and Clinical Service Interruption. *J Infect Dis.* 2021;223(6):1019-28.
- 453 12. Spicknall IH, Pollock ED, Clay PA, Oster AM, Charniga K, Masters N, et al. Modeling the Impact  
454 of Sexual Networks in the Transmission of Monkeypox virus Among Gay, Bisexual, and Other  
455 Men Who Have Sex with Men - United States, 2022. *MMWR Morb Mortal Wkly Rep.*  
456 2022;71(35):1131-5.
- 457 13. Van Dijck C, Hens N, Kenyon C, Tsoumanis A. The roles of unrecognized monkeypox cases,  
458 contact isolation and vaccination in determining epidemic size in Belgium. A modelling study. *Clin  
459 Infect Dis.* 2023;76:e1421-23.
- 460 14. Beer E, Rao VB. A systematic review of the epidemiology of human monkeypox outbreaks and  
461 implications for outbreak strategy. *PLoS Negl Trop Dis.* 2019;13:e0007791.
- 462 15. World Health Organization. Monkeypox Key Facts, 19 May 2022.
- 463 16. European Centre for Disease Prevention and Control. Considerations for contact tracing during the  
464 monkeypox outbreak in Europe, 2022 (28 June 2022).
- 465 17. Di Giulio DB, Eckburg PB. Human monkeypox: an emerging zoonosis. *Lancet Infect Dis.*  
466 2004;4(1):15-25.

- 467 18. Statistics Netherlands. The Netherlands in figures 2022. Accessed 15 November 2022. Available  
468 from: <https://opendata.cbs.nl/#/CBS/en>.
- 469 19. Rutgers NISSO Group. Sexual health in the Netherlands. Delft: Eburon; 2006.
- 470 20. Endo A, Murayama H, Abbott S, Ratnayake R, Pearson CAB, Edmunds WJ, et al. Heavy-tailed  
471 sexual contact networks and monkeypox epidemiology in the global outbreak, 2022. *Science*.  
472 2022;378:90-4.
- 473 21. Yorke J, Heathcote H, Nold A. Dynamics and control of the transmission of gonorrhoea. *Sex*  
474 *Transm Dis*. 1978;5:51-6.
- 475 22. Anderson RM, May RM. Infectious diseases of humans; dynamics and control. 1st ed ed. Oxford:  
476 Oxford University Press; 1992.
- 477 23. Hethcote HW, Yorke J. Gonorrhoea transmission dynamics and control. *Lecture Notes in*  
478 *Biomathematics* 56. 1984.
- 479 24. Xiridou M, Heijne J, Adam P, Op de Coul E, Matser A, de Wit J, et al. How the Disruption in  
480 Sexually Transmitted Infection Care Due to the COVID-19 Pandemic Could Lead to Increased  
481 Sexually Transmitted Infection Transmission Among Men Who Have Sex With Men in The  
482 Netherlands: A Mathematical Modeling Study. *Sex Transm Dis*. 2022;49(2):145-53.
- 483 25. Bisanzio D, Reithinger R. Keep calm and carry on: projected case burden and duration of the 2022  
484 monkeypox outbreak in non-endemic countries. *medRxiv* 2022.
- 485 26. Soa Aids Nederland. Uit de praktijk: 2 plekjes op de eikel, dat is toch geen monkeypox? Updated  
486 30 June 2022. Available from: [https://www.soaids.nl/nl/professionals/themas/seksoa-](https://www.soaids.nl/nl/professionals/themas/seksoa-magazine/uit-praktijk-2-plekjes-op-eikel-dat-is-toch-geen-monkeypox)  
487 [magazine/uit-praktijk-2-plekjes-op-eikel-dat-is-toch-geen-monkeypox](https://www.soaids.nl/nl/professionals/themas/seksoa-magazine/uit-praktijk-2-plekjes-op-eikel-dat-is-toch-geen-monkeypox).
- 488 27. Miura F, Backer JA, van Rijckevorsel G, Bavalia R, Raven S, Petrignani M, et al. Time scales of  
489 human mpox transmission in the Netherlands. *J Infect Dis*. 2023. In print.

- 490 28.National Institute of Public Health and the Environment (RIVM). Thermometer sexual health April  
491 2023.
- 492 29.Raccagni AR, Canetti D, Mileto D, Tamburini AM, Candela C, Albarello L, et al. Two individuals  
493 with potential monkeypox virus reinfection. *Lancet*. Published online 6 April 2023.
- 494 30.Miura F, van Ewijk CE, Backer JA, Xiridou M, Franz E, Op de Coul E, et al. Estimated incubation  
495 period for monkeypox cases confirmed in the Netherlands, May 2022. *Euro Surveill*.  
496 2022;27(24):2200448.
- 497 31.Bankuru SV, Kossol S, Hou W, Mahmoudi P, Rychtář J, Taylor D. A game-theoretic model of  
498 Monkeypox to assess vaccination strategies. *PeerJ*. 2020;8:e9272.
- 499 32.Brosius I, Van Dijck C, Coppens J, Vandenhove L, Bangwen E, Vanroye F, et al. Pre- and  
500 asymptomatic viral shedding in high-risk contacts of monkeypox cases: a prospective cohort study.  
501 *medRxiv* 2022.
- 502 33.Kozlov M. How deadly is monkeypox? What scientists know  
503 [https://www.nature.com/articles/d41586-022-02931-1#:~:text=](https://www.nature.com/articles/d41586-022-02931-1#:~:text=Out%20of%20more%20than%2057%2C000,over%20the%20past%20few%20decades.2022)  
504 [Out%20of%20more%20than%2057%2C000,over%20the%20past%20few%20decades.2022](https://www.nature.com/articles/d41586-022-02931-1#:~:text=Out%20of%20more%20than%2057%2C000,over%20the%20past%20few%20decades.2022) [
- 505 34.Fink D, Callaby H, Luintel A, Beynon W, Bond H, Lim E, et al. Clinical features and management  
506 of individuals admitted to hospital with monkeypox and associated complications across the UK: a  
507 retrospective cohort study. *Lancet Infect Dis*. Published online 22 December 2022.
- 508 35.Adam PCG, Op de Coul ELM, Zantkuijl P, Bos H, Xiridou M, Blom C, et al. An assessment of  
509 rates and covariates of mpox diagnosis and vaccination provides evidence to refine eligibility  
510 criteria for mpox vaccination among gay, bisexual, and other men who have sex with men in the  
511 Netherlands. *medRxiv preprint*. 2023:<https://doi.org/10.1101/2023.02.28.23286578>.
- 512  
513  
514

515 Table 1. Model parameters<sup>#</sup>

| Parameter                                                       |                                       | Value            | Source                   |
|-----------------------------------------------------------------|---------------------------------------|------------------|--------------------------|
| Duration latent period, days                                    | $1/\theta$                            | 5-8              | [13-17, 29]              |
| Days infectious total <sup>s</sup>                              | $\frac{1}{\gamma} + \frac{1}{\delta}$ | 14-28            | [13, 15-17, 20, 30]      |
| Days infectious not-refraining from sex                         | $1/\delta$                            | 2-8              | [12, 13, 16, 31]         |
| Days infectious refraining from sex                             | $1/\gamma$                            |                  |                          |
| Probability of transmission per sexual contact                  | $\beta_s$                             | 0.1-0.9          | [12, 14, 30]             |
| Vaccine efficacy for vaccines administered in the past          | $1 - \sigma_1$                        | 50-65%           | Data <sup>‡</sup>        |
| Vaccine efficacy for vaccines administered in 2022              | $1 - \sigma_2$                        | 80-90%           | [1, 15, 16]              |
| Mpox-related death rate                                         | $\mu_d$                               | 0.0004           | [32, 33]                 |
| Factor reducing infectiousness of those vaccinated in the past  | $v_1$                                 | $v_1 = \sigma_1$ |                          |
| Factor reducing infectiousness of those vaccinated in 2022      | $v_2$                                 | $v_2 = \sigma_2$ |                          |
| Hospitalization rate                                            | $\zeta$                               | 0.01-0.02        | Data <sup>‡</sup> , [33] |
| % of MSM who were in the past vaccinated against smallpox       |                                       | 25%              | [18]                     |
| Rate of entry into and exit out of the population*              | $\mu$                                 | 0.02/year        |                          |
| Mixing parameter for main regular partnerships                  | $\epsilon_M$                          | 0.1-0.9          |                          |
| Mixing parameter for casual partnerships                        | $\epsilon_C$                          | 0.1-0.9          |                          |
| Vaccination rate, per day**                                     | $\varphi_{ki}$                        | 0.0003-0.0005    |                          |
| Factor reducing transmission from infectious in abstinence      | $w$                                   | 0.15-0.7         | [16]                     |
| Number of MSM in the Netherlands                                |                                       | 250,000          | [18, 19]                 |
| Number casual partners/day, MSM very high sexual activity group |                                       | 0.7-1.0          | Table 2                  |

516 <sup>#</sup> Parameters with a range were included in the Latin Hypercube Sampling.

517 <sup>§</sup> The total number of days a mpox case is infectious is the sum of the days being infectious not in sexual abstinence and the  
518 days being infectious in abstinence.

519 \* Based on assumption that MSM are sexually active approximately for 50 years.

520 <sup>‡</sup> Data from the national database of notifiable infectious diseases of the Netherlands [7].

521 \*\* The vaccination rate is  $\varphi_{1i}$  for uninfected and  $\varphi_{2i}$  for exposed individuals of activity group  $i$ . Range of values shown is  
522 for fairly high and very high sexual activity groups, from 7 June 2022, chosen such that the weekly number of vaccinations  
523 was 0.5-1.5 times the weekly number of cases, assuming that in this period approximately one contact of each diagnosed case  
524 was vaccinated. The vaccination rate for the low activity groups was zero throughout the calculations.

525



526 Table 2. Parameters that depend on the sexual activity group of individuals.

| Parameter for activity group $i$                                      | Activity group |            |             |           |
|-----------------------------------------------------------------------|----------------|------------|-------------|-----------|
|                                                                       | Very low       | Fairly low | Fairly high | Very high |
| % in specific activity group*                                         | 45.1%          | 36.4%      | 17.7%       | 0.7%      |
| Rate of forming main regular partnerships per year* ( $\alpha_{Mi}$ ) | 0.1            | 0.2        | 0.7         | 0.7       |
| Number of sex contacts per main regular partner per day ( $u_i$ )     | 0.03           | 0.06       | 0.14        | 0.14      |
| % with main regular partner* ( $q_i$ )                                | 60%            | 51%        | 54%         | 42%       |
| Number of casual partners per day* ( $\alpha_{ci}$ )                  | 0.006          | 0.044      | 0.139       | 0.7-1.0   |

527 \* Parameters estimated from data from the first round of the “COVID-19, Sex, and Intimacy Survey” [24]. We used only data  
 528 from the questions relating to sexual activity in the second half of 2019 (before the start of the pandemic in the Netherlands).  
 529 Men in the very high sexual activity group reported more than 100 partners in the second half of 2019.

530

531 Table 3. Prior distributions of uncertain parameters relating to the adaptations in behaviour of MSM that may  
 532 have occurred in June/July 2022. Values were sampled from the uniform distribution with the ranges shown in  
 533 this table.

|                                                      | Days infectious<br>not refraining from<br>sexual contacts | Reduction* in number casual partners of group |             |           |
|------------------------------------------------------|-----------------------------------------------------------|-----------------------------------------------|-------------|-----------|
|                                                      |                                                           | Low**                                         | Fairly high | Very high |
| <b>Scenario with adaptations at one time point:</b>  |                                                           |                                               |             |           |
| After $T_2$                                          | 2-8                                                       | 0-30%                                         | 0-30%       | 0-30%     |
| <b>Scenario with adaptations at two time points:</b> |                                                           |                                               |             |           |
| Between $T_1$ and $T_2$                              | 2-8                                                       | 0-30%                                         | 0-30%       | 0-30%     |
| After $T_2$                                          | 2-8                                                       | 0-30%                                         | 0-30%       | 0-30%     |
| <b>Dates when adaptations occurred:</b>              |                                                           |                                               |             |           |
| $T_1$                                                |                                                           | 17-27 June 2022                               |             |           |
| $T_2$                                                |                                                           | 5-15 July 2022                                |             |           |

534 \* It was assumed that the number of casual partners of activity group  $i$  was  $\alpha_{ci}$  at the beginning of the outbreak (as estimated  
 535 from the data – see Table 2) and was reduced to  $(1 - D_{ij}) * \alpha_{ci}$  after day  $T_j$ , with  $D_{ij}$  sampled from the uniform distribution  
 536 between 0 and 0.3. The maximum of 30% reduction was based on preliminary results from the survey “Monkeypox: a new  
 537 challenge for your sex life” [9, 34] and reports from club owners in Amsterdam who experienced reduced numbers of visitors  
 538 in July 2022, with the reduction reaching its maximum at the end of July 2022 with approximately 30% less visitors (P.  
 539 Zantkuijl, personal communication).

540 \*\*Change applied to both very-low and fairly-low activity groups.

541

Uninfected      Exposed      Infectious not refraining from sex      Infectious refraining from sex      Recovered & immune

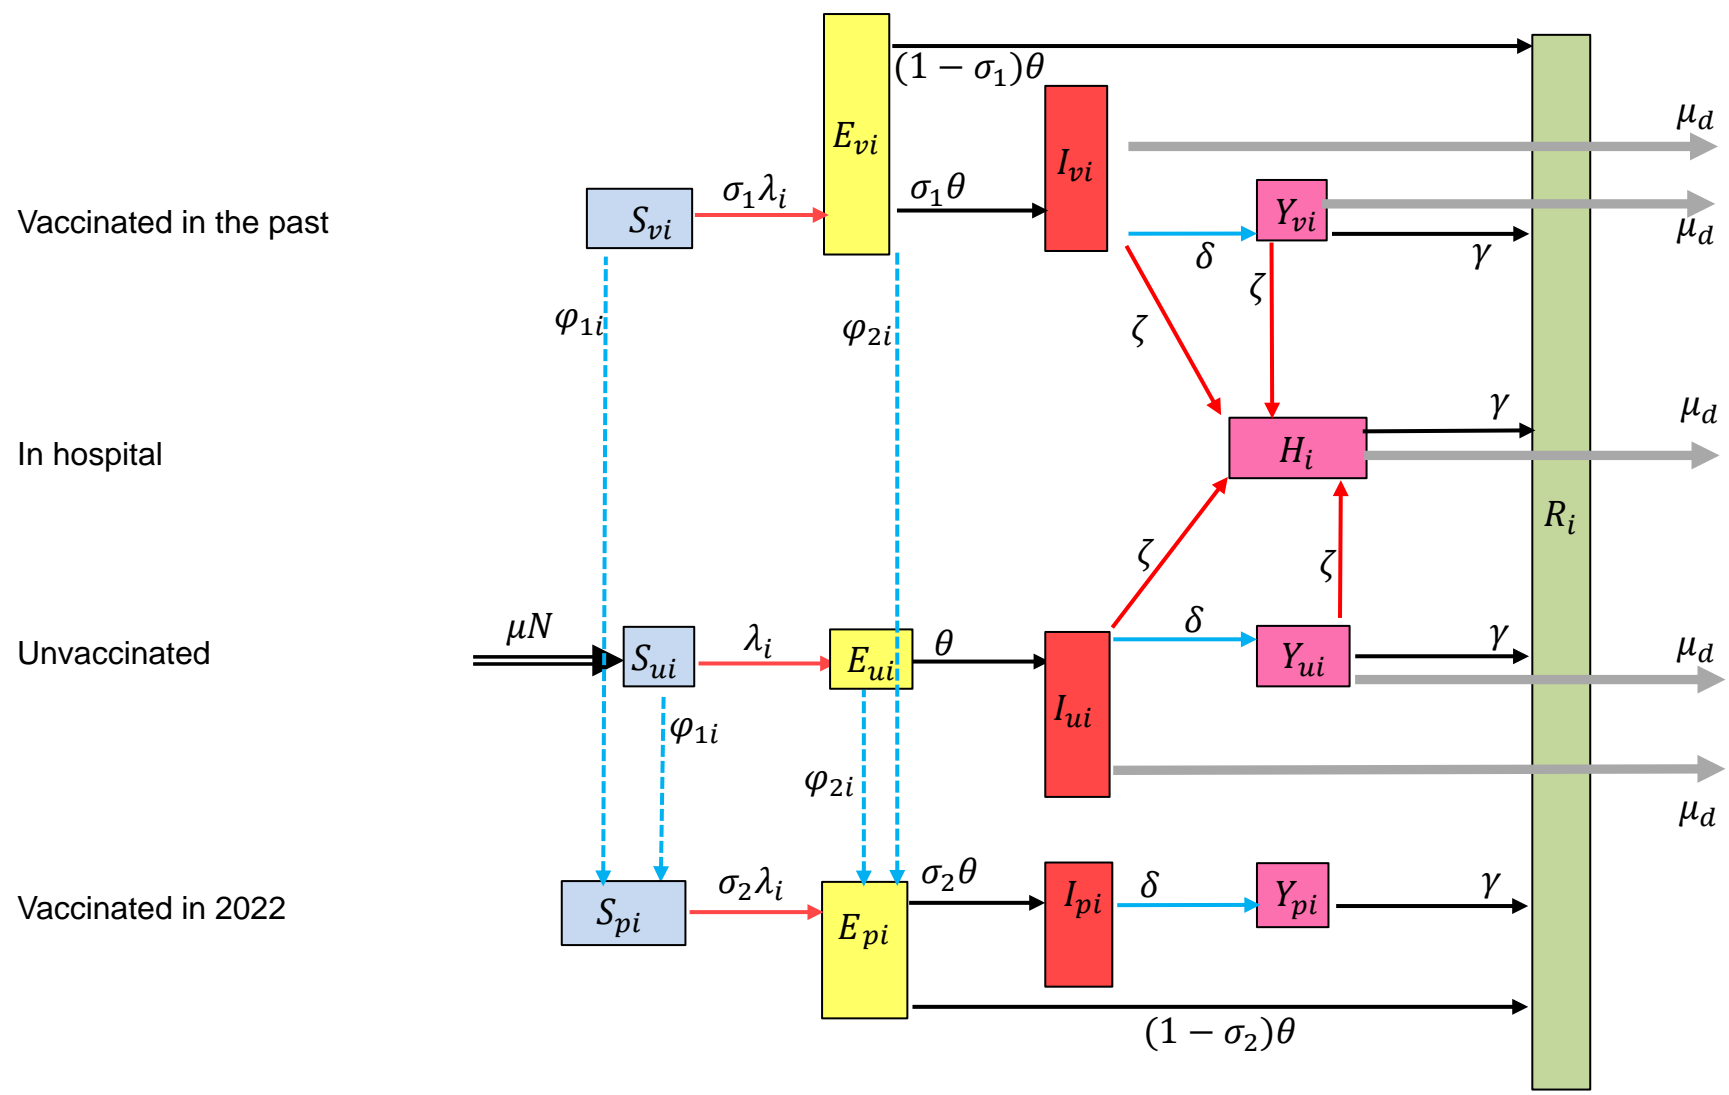

(a)

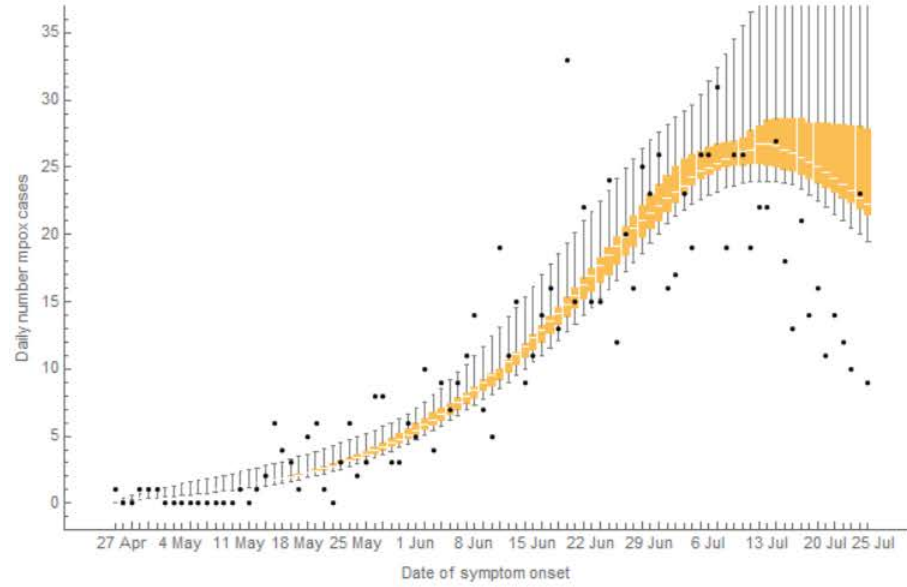

(b)

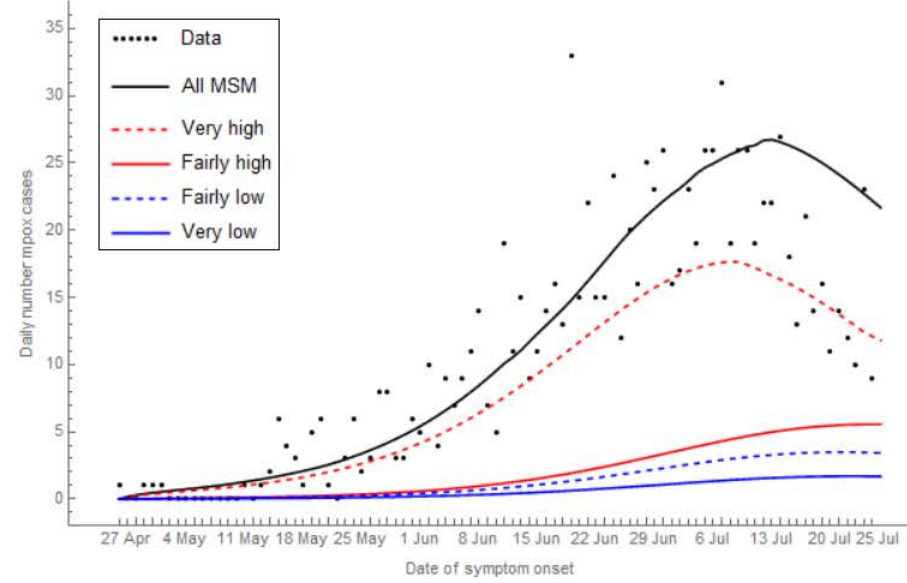

(c)

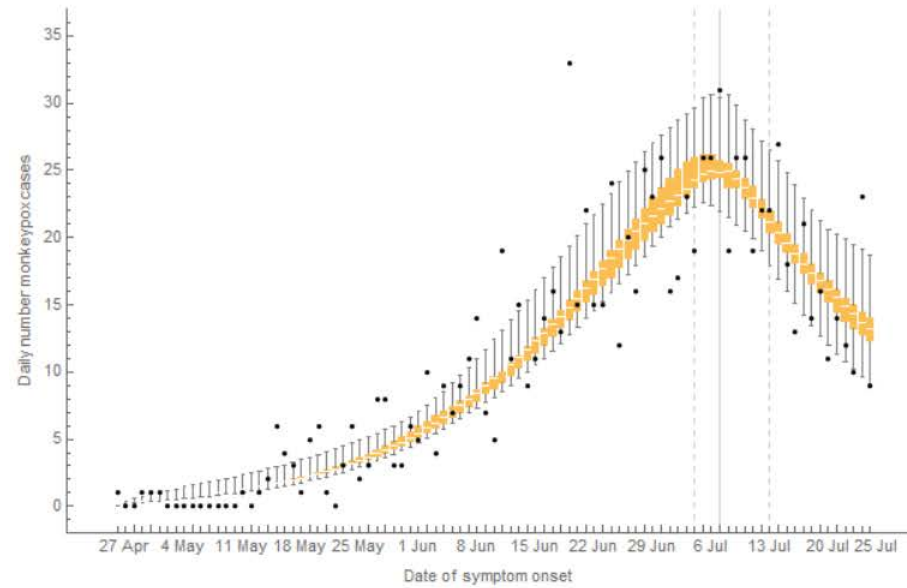

(d)

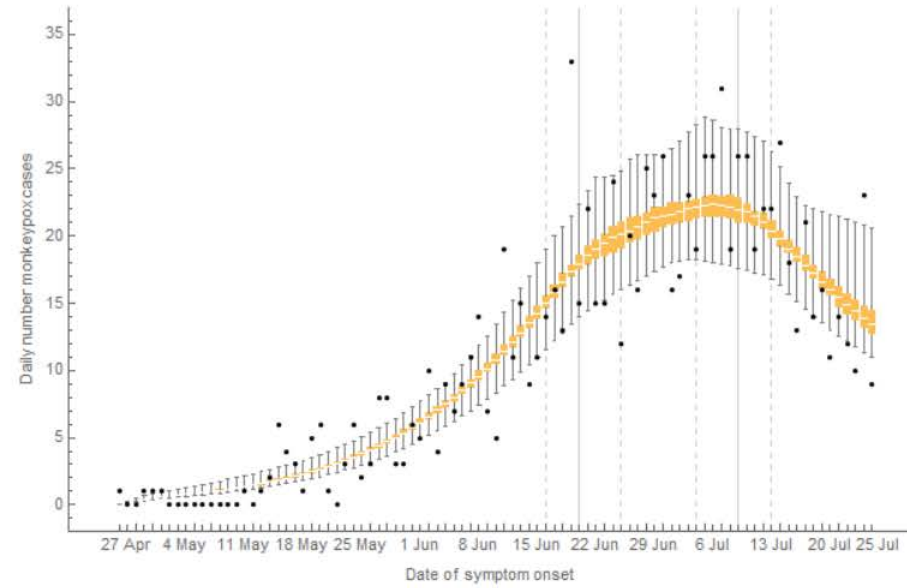

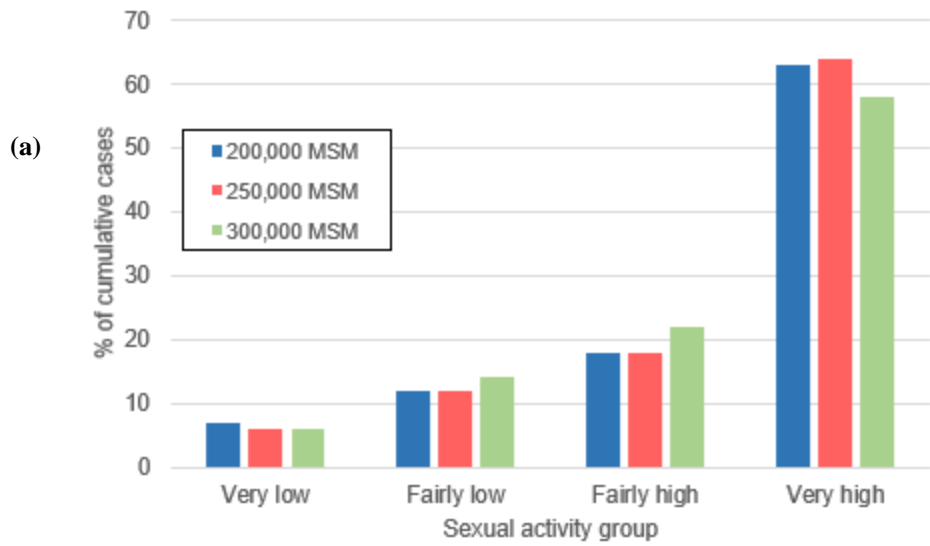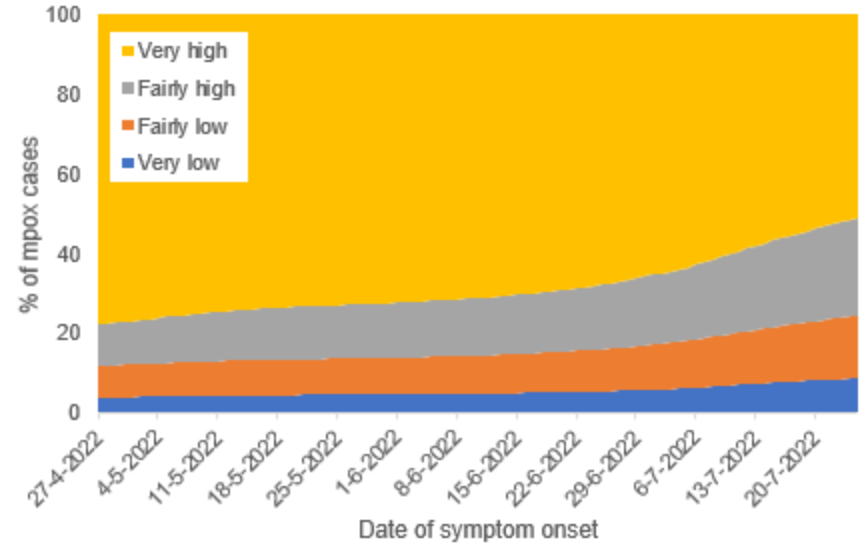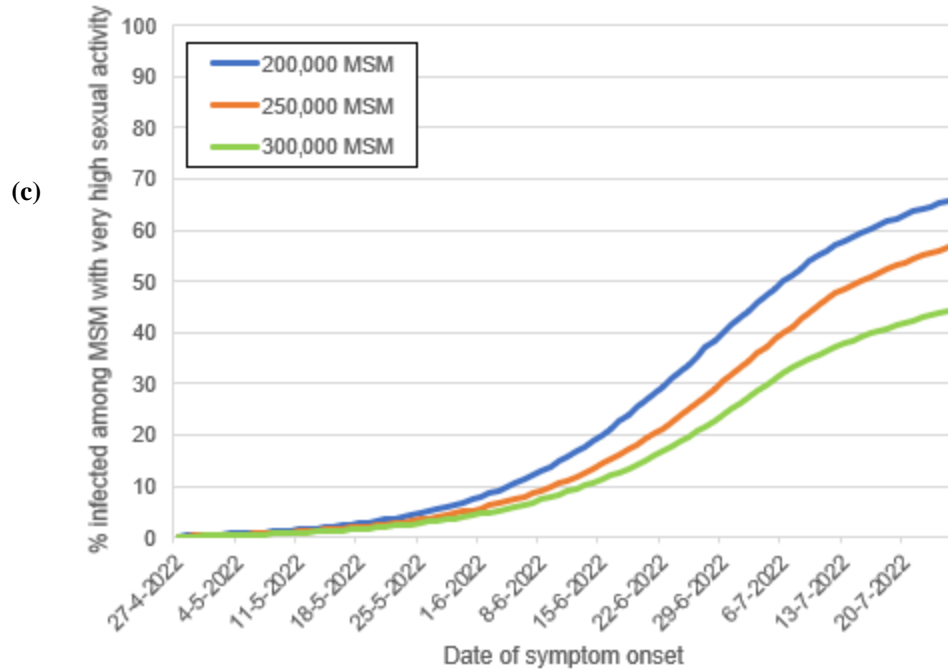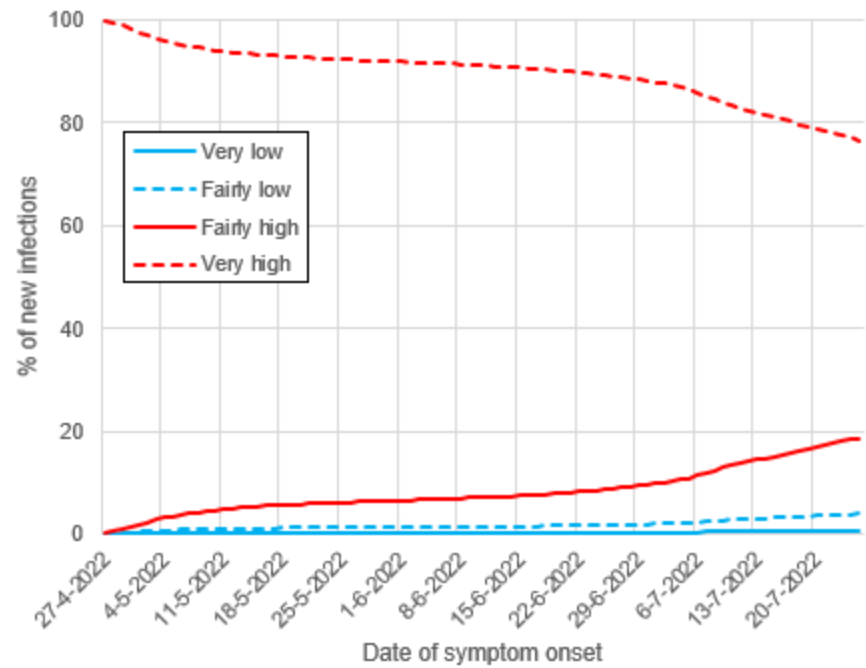

**(a)**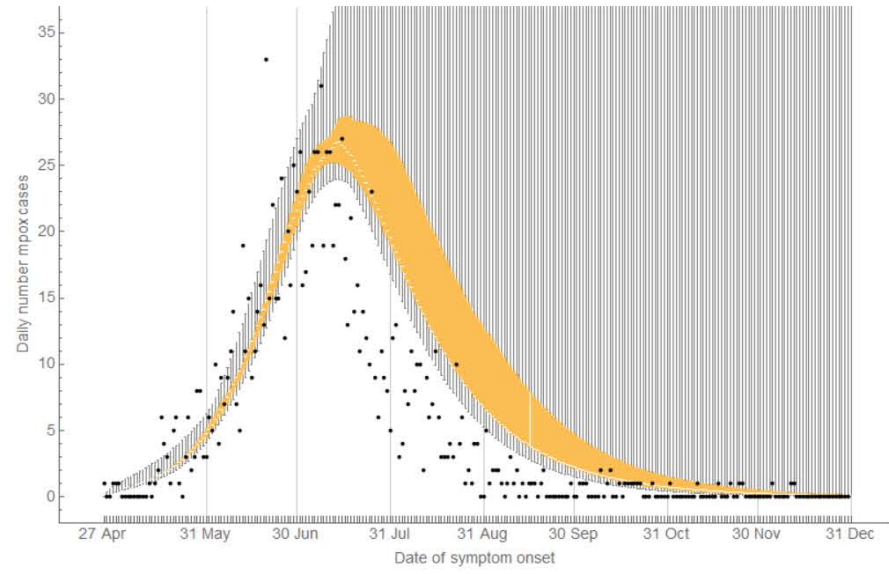**(b)**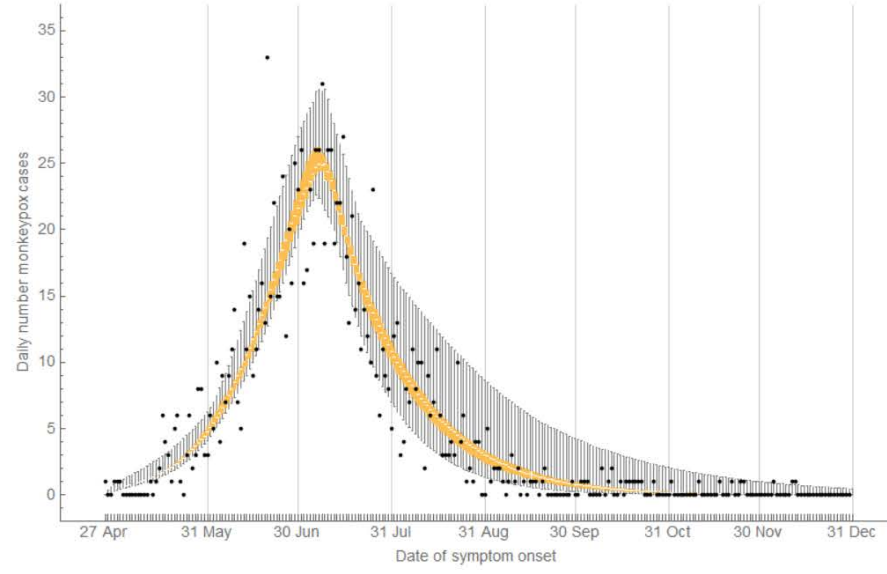**(c)**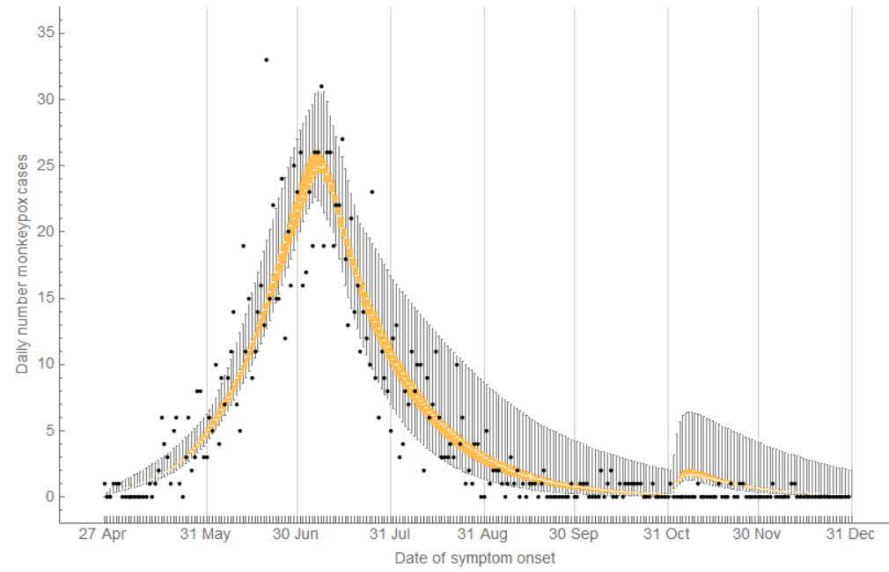**(d)**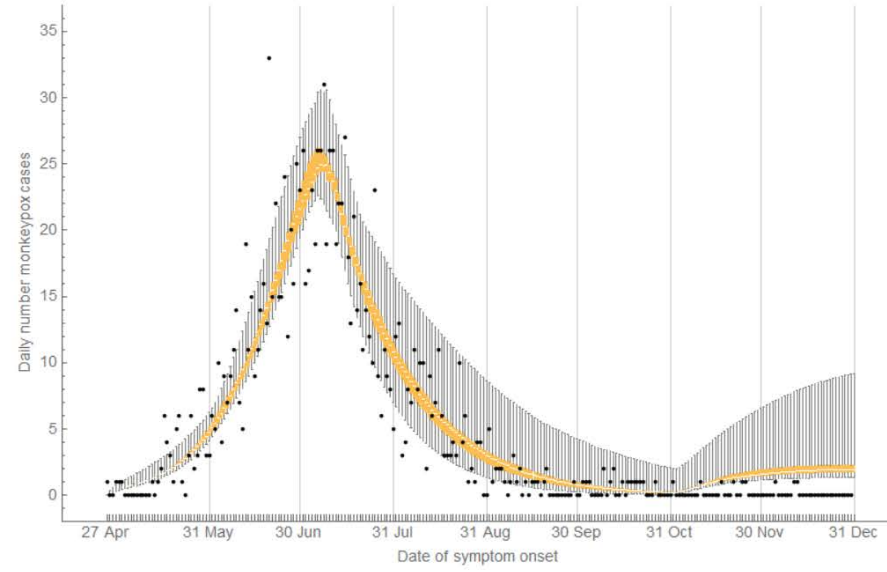

1 **The fading of the mpox outbreak among men who have sex with men: a**  
2 **mathematical modelling study**

3

4 **Maria Xiridou, Fuminari Miura, Philippe Adam, Eline Op de Coul, John de Wit, Jacco**  
5 **Wallinga**

6

7 **SUPPLEMENT**

8

## 9 **The transmission model**

10 We developed a deterministic compartmental model that describes monkeypox virus (MPXV) transmission  
11 among men who have sex with men (MSM). A schematic diagram of the model is shown in Figure 1 in the main  
12 text. We accounted only for transmission via sexual or intimate contacts among main (steady) and casual sex  
13 partners (for brevity, referred to as “sexual contacts”).

### 15 **Sexual partners**

16 MSM were divided into  $G = 4$  sexual activity groups, based on the total number of partners with whom they had  
17 sexual/intimate contacts. The number of these partners was obtained from data from the first round of the  
18 “COVID-19, Sex, and Intimacy Survey”, carried out in the summer of 2020 [1]. The survey was focussed on the  
19 impact of the first wave of the pandemic. However, as reference, participants were asked also about their sexual  
20 behaviour in the second half of 2019. We used the data of 2019, as representative of sexual activity without the  
21 temporal fluctuations caused by the COVID-19 pandemic, but also because participants were asked to report the  
22 number of male partners with whom they “had sex/intimacy in the second half of 2019”. Based on this number,  
23 we divided the population into four sexual activity groups: very low, fairly low, fairly high, and very high  
24 activity. The parameters relating to sexual behaviour of each activity group are shown in Table 2.

### 26 **The course of MPXV infection**

27 Individuals enter the population as susceptible ( $S_{ui}$ ) when they become sexually active. After infection,  
28 individuals are exposed but not infectious ( $E_{ui}$ ) and later become infectious ( $I_{ui}$ ). When individuals have  
29 symptoms and/or they are tested positive for MPXV infection, they may refrain from physical/sexual contacts or  
30 may be in isolation/confinement. We refer to these individuals as “refraining from sexual contacts” ( $Y_{ui}$ ). We  
31 assumed that individuals start refraining from sexual contacts  $1/\delta$  days after becoming infectious; infectious  
32 cases refraining from sexual contacts can still infect others, with a lower probability of transmission, for  
33 instance, because they do not completely refrain from sex contacts. Most of the infectious mpox cases recover  
34 after a few weeks and become immune ( $R_i$ ), but a small fraction of the infectious cases may develop  
35 complications and need hospitalization ( $H_i$ ) or die due to mpox.



36 Individuals born before 1974 were vaccinated in their first year of age against smallpox and that protects against  
37 MPXV infection and/or disease. Smallpox vaccination ended in 1974 in the Netherlands. Therefore, we assumed  
38 that in 2022 approximately 25% of sexually active MSM is vaccinated ( $S_{vi}$ ) via the old smallpox vaccination  
39 programmes, based on the age distribution of adult men in the Netherlands [2, 3]. We assumed that vaccinated  
40 men can still get infected with MPXV (and become exposed,  $E_{vi}$ ), but at a lower rate than that for unvaccinated  
41 individuals. Vaccinated exposed individuals have a lower rate of becoming infectious ( $I_{vi}$ ), than unvaccinated  
42 exposed individuals. Vaccinated infectious cases may refrain from sexual contacts ( $Y_{vi}$ ). We assumed that  
43 vaccination reduces the level of infectivity of vaccinated infectious cases, but the recovery rate, the  
44 hospitalization rate, and the MPXV-related death rate are similar for vaccinated and unvaccinated individuals.  
45 To account for different levels of protection by the old and the new vaccines, in the model we included  
46 individuals vaccinated in 2022 separately from those who had been vaccinated in the past (before 1974). The  
47 respective compartments in the model are denoted with  $S_{pi}$ ,  $E_{pi}$ ,  $I_{pi}$ ,  $Y_{pi}$  (uninfected, exposed, infectious not  
48 refraining from sexual contacts, infectious refraining from sexual contacts, respectively) with the subscript  
49  $p$  denoting those vaccinated in 2022 by means of pre-exposure or post-exposure prophylaxis. Susceptible  
50 individuals (unvaccinated or vaccinated in the past) may be vaccinated in 2022 at a rate  $\varphi_{1i}$ . Exposed individuals  
51 (unvaccinated or vaccinated in the past) may be vaccinated in 2022 at a rate  $\varphi_{2i}$ . The vaccination rates  $\varphi_{1i}$  and  
52  $\varphi_{2i}$  depend on the activity group  $i$ . We assumed that the protection of the new vaccine (against infection and  
53 disease) is higher than that from the old vaccine (Table 1). Both vaccine protections were modelled as a  
54 proportional reduction in the transmission rate.  
55 Hospitalized cases may die due to mpox or recover and become immune ( $R_i$ ). All MSM entering the sexually  
56 active population in 2022 are unvaccinated and susceptible to MPXV.

57

## 58 **Model equations**

59 The model is described by the system of ordinary differential equations shown below. The subscript  $u$  denotes  
60 unvaccinated individuals,  $v$  denotes individuals vaccinated in the past (with the old vaccine),  $p$  denotes  
61 individuals vaccinated in 2022 (with the new vaccine), and  $i = 1, 2, \dots, G$  denotes the  $i$ -th sexual activity group.

62 Equations for unvaccinated individuals:

$$63 \frac{dS_{ui}}{dt} = -(\lambda_i + \varphi_{1i} + \mu)S_{ui} + \mu N_i$$

$$64 \quad \frac{dE_{ui}}{dt} = \lambda_i S_{ui} - (\varphi_{2i} + \theta + \mu) E_{ui}$$

$$65 \quad \frac{dI_{ui}}{dt} = \theta E_{ui} - (\delta + \zeta + \mu + \mu_d) I_{ui}$$

$$66 \quad \frac{dY_{ui}}{dt} = \delta I_{ui} - (\gamma + \zeta + \mu + \mu_d) Y_{ui}$$

67 Equations for individuals vaccinated in the past:

$$68 \quad \frac{dS_{vi}}{dt} = -(\sigma_1 \lambda_i + \varphi_{1i} + \mu) S_{vi}$$

$$69 \quad \frac{dE_{vi}}{dt} = \sigma_1 \lambda_i S_{vi} - (\theta + \varphi_{2i} + \mu) E_{vi}$$

$$70 \quad \frac{dI_{vi}}{dt} = \sigma_1 \theta E_{vi} - (\delta + \zeta + \mu + \mu_d) I_{vi}$$

$$71 \quad \frac{dY_{vi}}{dt} = \delta I_{vi} - (\gamma + \zeta + \mu + \mu_d) Y_{vi}$$

72 Equations for individuals vaccinated in 2022:

$$73 \quad \frac{dS_{pi}}{dt} = \varphi_{1i}(S_{ui} + S_{vi}) - (\sigma_2 \lambda_i + \mu) S_{pi}$$

$$74 \quad \frac{dE_{pi}}{dt} = \sigma_2 \lambda_i S_{pi} + \varphi_{2i}(E_{ui} + E_{vi}) - (\theta + \mu) E_{pi}$$

$$75 \quad \frac{dI_{pi}}{dt} = \sigma_2 \theta E_{pi} - (\delta + \mu) I_{pi}$$

$$76 \quad \frac{dY_{pi}}{dt} = \delta I_{pi} - (\gamma + \mu) Y_{pi}$$

77 Equations for recovered/immune and hospitalized individuals:

$$78 \quad \frac{dR_i}{dt} = \gamma(Y_{ui} + Y_{vi} + Y_{pi} + H_i) + (1 - \sigma_1)\theta E_{vi} + (1 - \sigma_2)\theta E_{pi} - \mu R_i$$

$$79 \quad \frac{dH_i}{dt} = \zeta(I_{ui} + I_{vi} + Y_{ui} + Y_{vi}) - (\gamma + \mu + \mu_d) H_i$$

80 The parameters and variables in these equations are explained in the following sections and in Tables 1-3.

81 **Transmission rate**

82 The rate at which MSM in activity group  $i$  get infected with MPXV is  $\lambda_i = \lambda_{mi} + \lambda_{ci}$ , where  $\lambda_{mi}$  and  $\lambda_{ci}$  denote  
83 the rates of getting infected by main and casual partners, respectively:

- 84 • The rate of getting infected by main regular partners:

85 
$$\lambda_{mi} = q_i \sum_{k=u,v,p} \sum_{j=1}^4 m_{Mij} [1 - (1 - \beta_{sk})^{u_{ij}}] \frac{I_{kj} + wY_{kj}}{N_j}$$

86

- 87 • The rate of getting infected by casual partners:

88 
$$\lambda_{ci} = \alpha_{ci} \sum_{k=u,v,p} \sum_{j=1}^4 \beta_{sk} m_{Cij} \frac{I_{kj} + wY_{kj}}{N_j}$$

89 In these equations, the following notation is used:

- 90 •  $q_i$  is the fraction of MSM of activity group  $i$  with a main regular partner.
- 91 •  $u_{ij}$  is the frequency of sex contacts between main sexual partners of activity groups  $i, j$ , calculated as  $u_{ij} =$   
92  $(u_i + u_j)/2$ , from the contact frequency  $u_i$  and  $u_j$  of sexual activity groups  $i$  and  $j$ , respectively.
- 93 •  $\beta_{sk}$  is the probability of transmission of MPXV per sexual/intimate contact from an infectious individual  
94 who is unvaccinated ( $k = u$ ), vaccinated in the past ( $k = v$ ), or vaccinated in 2022 ( $k = p$ ), with  $\beta_{su} = \beta_s$ ,  
95  $\beta_{sv} = v_1\beta_s$ ,  $\beta_{sp} = v_2\beta_s$ . The probability  $\beta_s$  of transmission per sexual contact with an unvaccinated  
96 individual is reduced by  $v_1$  for those who were vaccinated in the past and by  $v_2$  for those vaccinated in  
97 2022.
- 98 •  $w$  is a factor reducing the transmission potential of an infectious individual practicing sexual abstinence  
99 compared to infectious individuals not in abstinence.
- 100 •  $\alpha_{ci}$  is the number of casual sex contacts per day for men in activity group  $i$ .
- 101 •  $N_j$  is the total size of activity group  $j$  and  $N = \sum_{j=1}^G N_j$  is the total size of the MSM population.
- 102 •  $m_{Mij}$  and  $m_{Cij}$  are parameters that define the level of mixing between sexual activity groups  $i, j$ , when  
103 forming main and casual partnerships, respectively. These are defined by the equations:

104 
$$m_{Mij} = \varepsilon_M \delta_{ij} + (1 - \varepsilon_M) \frac{\alpha_{Mj} N_j}{\sum_{v=1}^G \alpha_{Mv} N_v} \quad \text{and} \quad m_{cij} = \varepsilon_c \delta_{ij} + (1 - \varepsilon_c) \frac{\alpha_{cj} N_j}{\sum_{v=1}^G \alpha_{cv} N_v},$$

105 where  $\delta_{ij}$  is the Kronecker delta (being equal to 1, if  $i = j$ ; and equal to 0, otherwise) and the parameters  
106  $\varepsilon_s, \varepsilon_c$  determine the level of assortativeness in mixing of activity groups when forming main and casual  
107 partnerships, respectively (if  $\varepsilon_i = 1$ , then mixing is assortative; if  $\varepsilon_i = 0$ , then mixing is proportionate).

108

### 109 **The size of the MSM population**

110 Estimates of the size of the MSM population vary from 111,072 [4] to 392,000 [5]. The variation depends  
111 mostly on the ages included in the estimate (for instance, from 15 or 17 years old; up to 65 or 69 years old) and  
112 the definition of MSM (men who had sex with men in the previous six/twelve months; or ever having sex with  
113 men; or identifying themselves as homosexual/bisexual). Based on the size of the male population [2] and  
114 prevalence estimates of same-sex behaviour [5], we assumed that the number of MSM in 2022 was around  
115 250,000. Due to uncertainty about this estimate, we repeated the analyses with 200,000 MSM and 300,000  
116 MSM.

117

### 118 **Adaptations that may have occurred in the first three months of the outbreak**

119 By ordering diagnosed mpox cases according to date of symptom onset, the peak was between 6 and 10 July  
120 2022. The first diagnosis of mpox was on 20 May 2022. By the beginning of June, the number of diagnoses was  
121 increasing and there were messages about mpox in the news, social media, and MSM websites [6-9]. This has  
122 probably enhanced awareness among MSM and health care practitioners, enabling earlier recognition of mpox  
123 symptoms, even during the prodromal phase with systemic symptoms like fever, fatigue, and ache. In an online  
124 survey carried out in August 2022, most MSM responded correctly to questions about symptomatology and  
125 routes of transmission of mpox and reported to be willing to refrain from close physical and sexual contacts if  
126 they were infected with MPXV [10]. As the severity of the outbreak was increasing, MSM were possibly more  
127 willing to refrain from sexual/intimate contacts when they suspected or were diagnosed with MPXV infection,  
128 thus reducing the time they were infectious and not yet refraining from sexual contacts. The spread of  
129 information about mpox and the severity of the outbreak may have also influenced the sexual behaviour of  
130 MSM. In the same survey, more than half of the participants reported a reduction in their sexual activity due to  
131 the mpox outbreak [10]. Furthermore, sex venues and parties reported low numbers of visitors in July 2022 [11],

132 with the reduction reaching its maximum at the end of July, when some club owners observed up to 30% less  
133 visitors than what was expected (P. Zantkuijl, personal communication). This points to a decline in sexual  
134 activity of men visiting these accommodations.

135 Therefore, in this study, we examined two possible adaptations: (a) MSM may start refraining from sexual  
136 contacts earlier during the infectious period, thus resulting in shorter infectious period while not refraining from  
137 sexual contacts and (b) a reduction in the number of casual partners. The level and the timing of the adaptations  
138 was obtained from the fitting process. We examined two scenarios with adaptations either (a) at one time point  
139  $T_2$  in the period 5-15 July 2022 or (b) at two time points  $T_1$  in the period 17-27 June 2022 and  $T_2$  in the period 5-  
140 15 July 2022. These time periods were close to messages placed on ManTotMan socials and the announcement  
141 of the Dutch government on 7 July 2022 to start with the monkeypox vaccination programme.

142 We included a reduction  $D_{4j}$  in the number of casual partners of men in the very high sexual activity group,  $D_{3j}$   
143 for men in the fairly high sexual activity group, and a reduction  $D_{2j}$  for men in the very low and fairly low  
144 sexual activity groups. The reduction  $D_{ij}$  occurred on day  $T_j = T_1$  or  $T_j = T_2$ . The six values  $D_{ij}$  ( $i = 2,3,4$  and  
145  $j = 1,2$ ) were sampled from the same range (0-30% reduction), since we are uncertain about the occurrence of  
146 the decline. Similarly, we sampled three values for the duration of the infectious period before refraining from  
147 sexual contacts: one for the duration in the beginning of the outbreak, a second value for the period between  $T_1$   
148 and  $T_2$ , and a third value for the period after  $T_2$ . All three values were sampled from the same range (2-8 days)  
149 since we were uncertain whether an adaptation in this duration occurred and when.

150

### 151 **Model fitting**

152 The model was fitted to data on the number of diagnosed mpox cases using a Bayesian approach. Parameters  
153 relating to sexual behaviour were estimated from data or obtained from the literature (Table 2), except from: (a)  
154 the two parameters for assortativeness in sexual mixing and (b) the number of casual partners of the group with a  
155 very high sexual activity level. These were included as uncertain parameters, due to lack of reliable data and  
156 because the model results were very sensitive to these parameters (based on our preliminary analyses). Further,  
157 most of the parameters relating to mpox were uncertain (Table 1) and were obtained via the fitting process.

158

159

160 The uncertain parameters were divided into two groups:

- 161 1. Parameters relating to behavioural adaptations that occurred in June/July 2022 (Table 3): adaptation in the  
162 number of casual partners; adaptation in the number of days that an individual is infectious and not in  
163 abstinence; and two parameters for the timing of these adaptations.
- 164 2. Main parameters (Table 1): all the other parameters, except those relating to the adaptations that occurred in  
165 June/July 2022.

166 The fitting process was carried out in two steps:

- 167 1. In the first step, we fitted the model to the numbers of daily mpox cases registered in the national database  
168 of notifiable infectious diseases of the Netherlands until 17 June or until 5 July 2022. We defined uniform  
169 prior distributions for the uncertain parameters (Tables 1). Using Latin Hypercube Sampling [12], we  
170 sampled 10,000 combinations of values from the prior distributions and repeated the model calculations  
171 with each parameter combination. From the model, we calculated the daily numbers of mpox cases with  
172 each parameter combination. We calculated the Poisson likelihood of the above numbers, thus obtaining the  
173 posterior distributions of the uncertain parameters (except those relating to the behavioural adaptations in  
174 June/July 2022), reflecting the situation in the beginning of the outbreak.
- 175 2. In the second step, we used the posterior distributions obtained from the first step of the fitting process and  
176 fitted the model to data from 17 June or 5 July 2022 until 25 July 2022. The modelled mpox cases were  
177 compared with the respective data with date of symptom onset in this time interval. We calculated their  
178 Poisson likelihood and obtained the posterior distributions of the uncertain parameters relating to  
179 behavioural adaptations that occurred in June/July 2022.

180

## 181 **Data sources**

182 The following data sources were used in this study.

183 *National surveillance system for notifiable diseases (OSIRIS)*: Individuals seeking mpox testing or presenting  
184 with symptoms suggestive of mpox to general practitioners or health centres were referred and notified to the  
185 regional public health service for mpox diagnostics [9]. Notification of confirmed mpox cases from regional  
186 public health services to the National Institute of Public Health and the Environment was accompanied by a  
187 questionnaire with demographical, clinical, and epidemiological information of cases. The numbers of confirmed

188 mpox cases according to date of symptom onset were extracted from this database. These numbers were  
189 continuously updated during the outbreak and were available online on <https://www.rivm.nl/mpox-apenpokken>.  
190 *COVID-19, Sex, and Intimacy Survey*: This is a repeated cross-sectional self-report survey. The first round of  
191 data collection was carried out from the end of July 2020 to the beginning of September 2020 [13, 14].  
192 Participants were recruited via social media advertisement on Facebook and Instagram. People were eligible to  
193 participate if they: lived in the Netherlands, were 18 years or older, identified as male and ever had sex with a  
194 man. All participants provided informed consent and received no compensation. Only responses from eligible  
195 participants who fully completed the questionnaire were used for the analyses presented here. The aim of the  
196 survey was to investigate the impact of the COVID-19 pandemic on sexual behaviour. Therefore, respondents  
197 were asked to report on their sexual behaviour during the first half of 2020 and, as reference, their sexual  
198 behaviour during the last six months of 2019. In the present study, we used data only from the responses for the  
199 period July-December 2019. For these questions, 5,683 participants reported their sexual behaviour.  
200

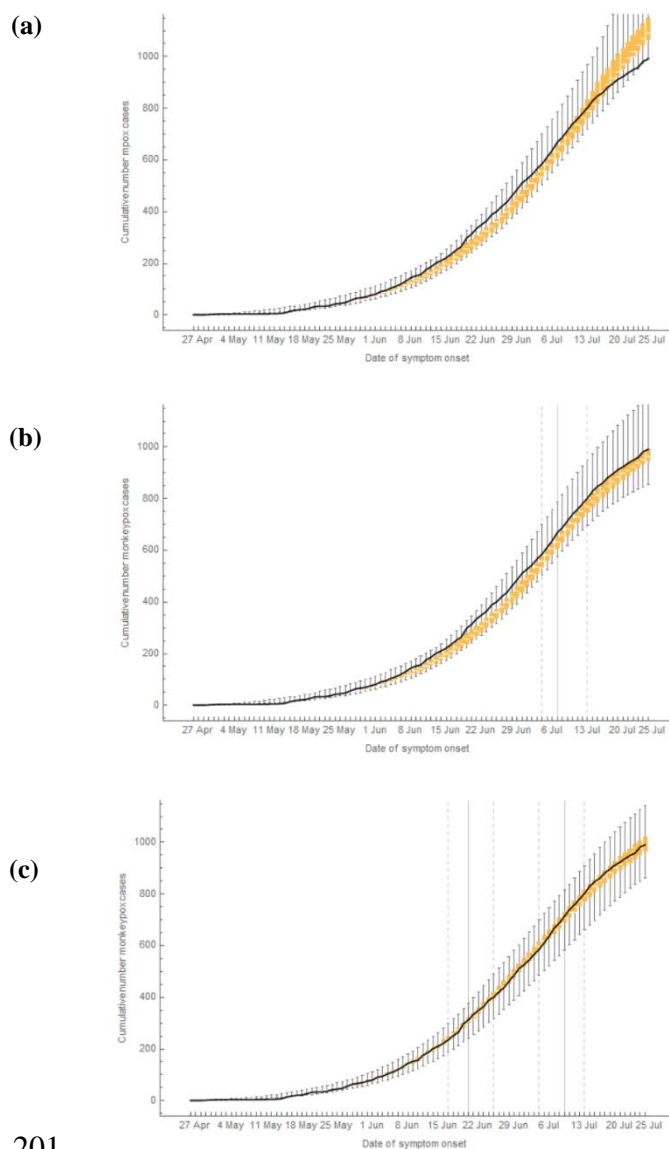

201

202 **Figure S1.** The cumulative number of mpoX cases among MSM in the Netherlands from 27 April to 25 July  
203 2022. Cases are shown according to date of symptom onset (on horizontal axes). Solid black line shows data  
204 from 27 April to 25 July 2022, from the national database of notifiable infectious diseases of the Netherlands.  
205 Orange box-plots show the medians and interquartile ranges obtained from the model in a population of 250,000  
206 MSM (a) without behavioural adaptations; (b) with behavioural adaptations only in July 2022; (c) with  
207 behavioural adaptations in June and in July 2022. In (b)-(c), the vertical grey lines show the medians (solid line)  
208 and the 95% credible intervals (dashed lines) of the time point at which the adaptations occurred, as obtained  
209 from the model fitting.



210

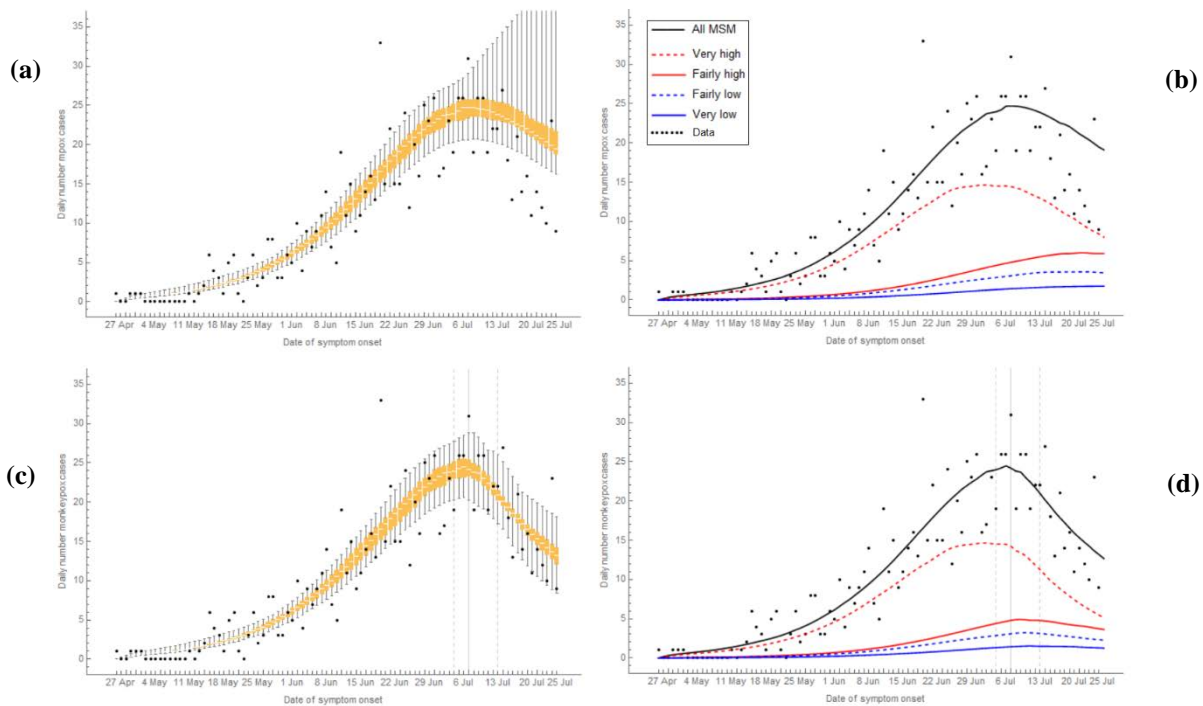

211 **Figure S2.** The daily number of mpox cases among MSM in the Netherlands from 27 April to 25 July 2022.  
212 Black bullets show data from the national database of notifiable diseases of the Netherlands; the other lines were  
213 calculated from the model. Mpox cases are shown according to date of symptom onset. Left panels: box-plots of  
214 daily number of mpox cases in the overall MSM population. Right panels: median daily number of mpox cases  
215 in the overall MSM population (black line), in the groups with high sexual activity level (red lines), and in the  
216 groups with low sexual activity level (blue lines). (a), (b): without behavioural adaptations; (c), (d): with  
217 behavioural adaptations in July 2022. Vertical grey lines show median (solid line) and 95% credible interval  
218 (dashed lines) of the day at which the behavioural adaptations occurred, as obtained from the model fitting.  
219 Model results were calculated in a population of 200,000 MSM.

220

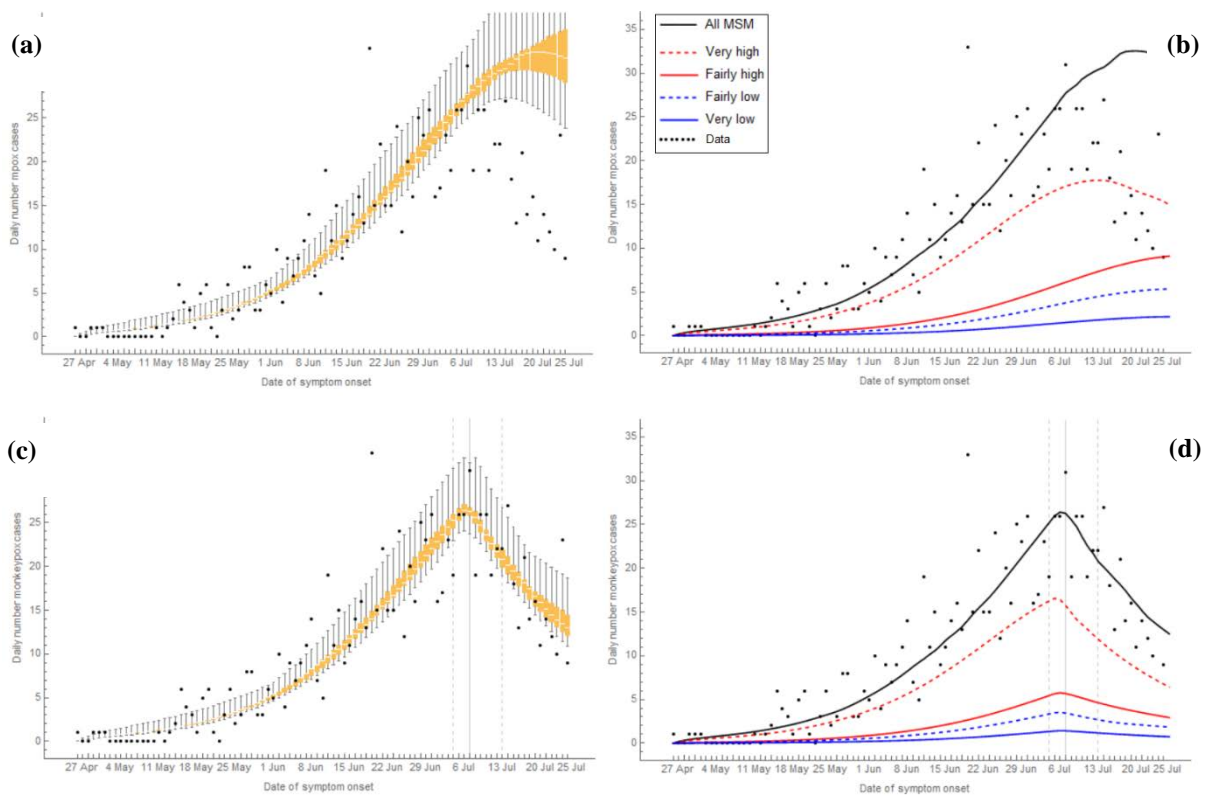

221

222 **Figure S3.** The daily number of mpox cases among MSM in the Netherlands from 27 April to 25 July 2022.

223 Black bullets show data from the national database of notifiable diseases of the Netherlands; the other lines were  
 224 calculated from the model. Mpox cases are shown according to date of symptom onset. Left panels: box-plots of  
 225 daily number of mpox cases in the overall MSM population. Right panels: median daily number of mpox cases  
 226 in the overall MSM population (black line), in the groups with high sexual activity level (red lines), and in the  
 227 groups with low sexual activity level (blue lines). (a), (b): without behavioural adaptations; (c), (d): with  
 228 behavioural adaptations in July 2022. Vertical grey lines show median (solid line) and 95% credible interval  
 229 (dashed lines) of the day at which the behavioural adaptations occurred, as obtained from the model fitting.

230 Model results were calculated in a population of 300,000 MSM.

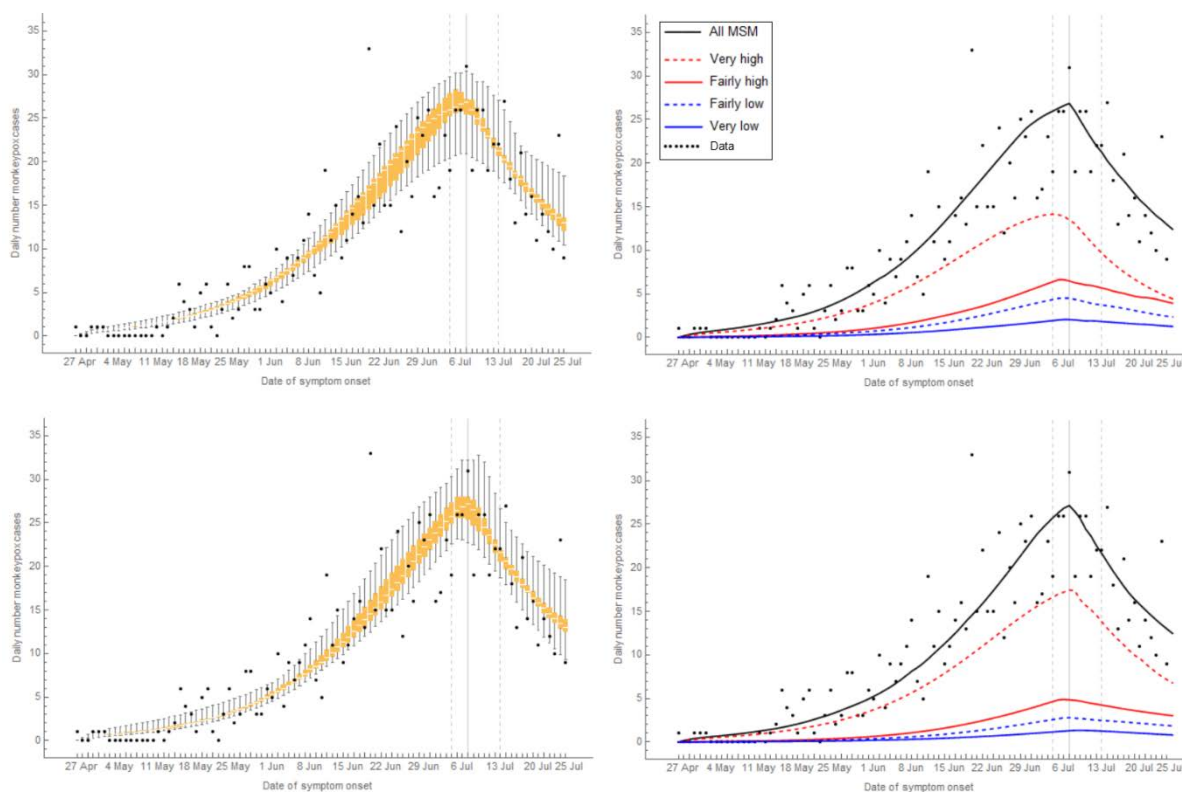

231

232 **Figure S4.** Sensitivity analyses for the percentage of the population being vaccinated in the past (before 1974),  
233 via the old smallpox vaccination programme. Two scenarios are shown, with behavioural adaptations in July  
234 2022, in a population of 250,000 MSM, of whom 25% in total had been vaccinated in the past. Top panels: the  
235 percentage vaccinated in the past was the highest in the group with the highest level of sexual activity: 23%,  
236 25%, 30%, 40% vaccinated in the group with very low, fairly low, fairly high, or very high level of sexual  
237 activity, respectively. Bottom panels: the percentage vaccinated in the past was the highest in the group with the  
238 lowest level of sexual activity: 29%, 25%, 15%, 10% vaccinated in the group with very low, fairly low, fairly  
239 high, or very high level of sexual activity, respectively. Numbers shown are the daily numbers of mpox cases  
240 among MSM in the Netherlands from 27 April to 25 July 2022, from the data (black bullets) and from the model  
241 (orange box plots and lines) – the plots are as explained in Figure S3.

242

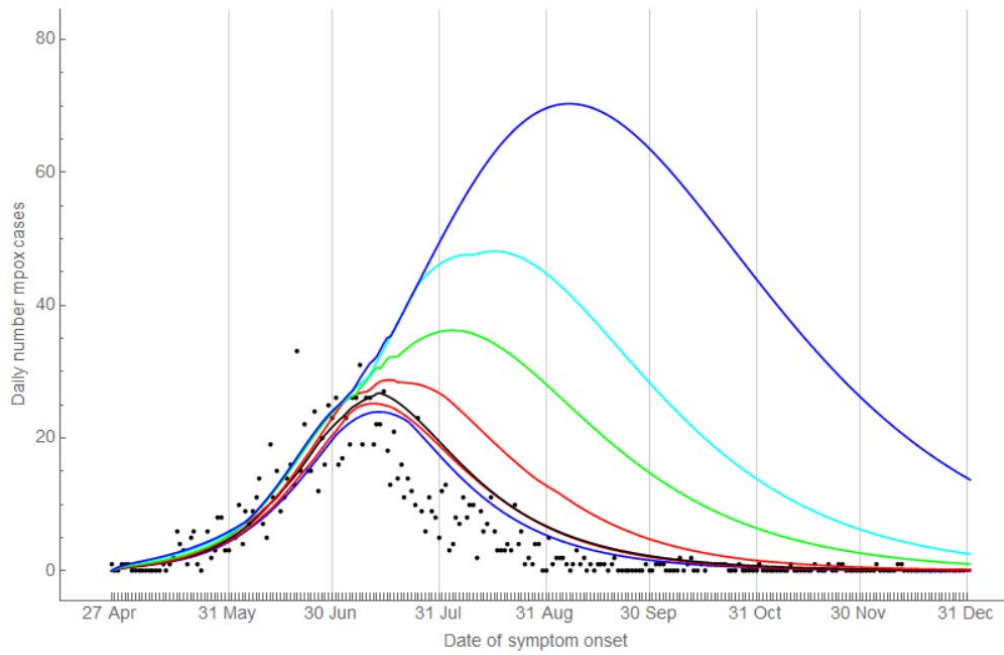

243

244 **Figure S5.** The daily number of mpox cases among MSM in the Netherlands from 27 April to 31 December  
245 2022, in the scenario without behavioural adaptations. Black bullets show data from the national database of  
246 notifiable diseases of the Netherlands, as shown in Figure 4a in the main text. The lines were calculated from the  
247 model. Mpox cases are shown according to date of symptom onset. Black line: median; red lines: interquartile  
248 range; blue lines, 95% credible interval; cyan line, upper 5<sup>th</sup> percentile; green line, upper 10<sup>th</sup> percentile. Vertical  
249 grey lines show the last day of each calendar month. Model results were calculated in a population of 250,000  
250 MSM.

251  
252  
253

**Table S1.** Posterior distributions of uncertain model parameters obtained from the fitting process for the two scenarios with adaptations in behaviour of MSM only in July 2022 or in June and July 2022. Results shown are the medians and 95% credible intervals, in a population of 250,000 MSM.

|                                                                                  | Adaptations only in July 2022 |           |           | Adaptations in June & July 2022 |           |           |
|----------------------------------------------------------------------------------|-------------------------------|-----------|-----------|---------------------------------|-----------|-----------|
|                                                                                  | Median                        | 95% range |           | Median                          | 95% range |           |
| Latent period, days ( $1/\theta$ )                                               | 5.67                          | 5.03      | 6.97      | 5.80                            | 5.10      | 7.81      |
| Infectious period ( $1/\gamma + 1/\delta$ )                                      | 16.75                         | 14.27     | 24.07     | 18.41                           | 14.26     | 24.46     |
| Transmission probability per sex act                                             | 0.48                          | 0.39      | 0.81      | 0.48                            | 0.39      | 0.67      |
| Number casual partners per day, very-high activity group                         | 0.89                          | 0.73      | 1.00      | 0.90                            | 0.73      | 1.00      |
| Factor reducing transmission when in abstinence ( $w$ )                          | 19%                           | 15%       | 37%       | 22%                             | 16%       | 46%       |
| Assortativeness mixing with main partners ( $\epsilon_M$ )                       | 0.72                          | 0.13      | 0.88      | 0.69                            | 0.12      | 0.85      |
| Assortativeness mixing with casual partners ( $\epsilon_C$ )                     | 0.87                          | 0.20      | 0.90      | 0.84                            | 0.48      | 0.90      |
| Vaccination rate before 25 July 2022                                             | 0.04%                         | 0.03%     | 0.05%     | 0.04%                           | 0.03%     | 0.05%     |
| Efficacy old vaccine ( $v_1 = \sigma_1$ )                                        | 56%                           | 52%       | 65%       | 58%                             | 50%       | 63%       |
| Efficacy new vaccine ( $v_2 = \sigma_2$ )                                        | 85%                           | 80%       | 90%       | 85%                             | 80%       | 89%       |
| Hospitalization rate, $\zeta$                                                    | 1%                            | 1%        | 2%        | 2%                              | 1%        | 2%        |
| Days infectious not refraining from sex, before $T_1$                            | 6.05                          | 4.45      | 7.80      | 6.89                            | 3.74      | 7.78      |
| Days infectious not refraining from sex, between $T_1$ and $T_2$                 | As before $T_1$               |           |           | 5.60                            | 2.94      | 7.83      |
| Days infectious not refraining from sex, after $T_2$                             | 2.55                          | 2.00      | 4.31      | 2.44                            | 2.02      | 4.87      |
| Date of adaptations in June, $T_1$                                               | Not applicable                |           |           | 21-6-2022                       | 17-6-2022 | 26-6-2022 |
| Date of adaptations in July, $T_2$                                               | 7-7-2022                      | 5-7-2022  | 11-7-2022 | 10-7-2022                       | 5-7-2022  | 14-7-2022 |
| % reduction casual partners, low activity groups, after $T_2$                    | 13%                           | 1%        | 28%       | 13%                             | 0%        | 28%       |
| % reduction casual partners, fairly-high activity group, after $T_2$             | 15%                           | 1%        | 29%       | 18%                             | 3%        | 29%       |
| % reduction casual partners, very-high activity group, after $T_2$               | 24%                           | 1%        | 30%       | 22%                             | 4%        | 30%       |
| % reduction casual partners, low activity groups, between $T_1$ and $T_2$        | Not applicable                |           |           | 17%                             | 2%        | 29%       |
| % reduction casual partners, fairly-high activity group, between $T_1$ and $T_2$ |                               |           |           | 16%                             | 1%        | 29%       |
| % reduction casual partners, very-high activity group, between $T_1$ and $T_2$   |                               |           |           | 18%                             | 1%        | 29%       |

254

255 **Table S2.** Posterior distributions of uncertain model parameters obtained from the fitting process for the scenario with adaptations in behaviour of MSM only in July 2022.  
 256 Results shown are the medians and 95% credible intervals, in a population of 200,000 or 300,000 MSM.

257

|                                                                      | 200,000 MSM |           |           | 300,000 MSM |           |          |
|----------------------------------------------------------------------|-------------|-----------|-----------|-------------|-----------|----------|
|                                                                      | Median      | 95% range |           | Median      | 95% range |          |
| Latent period, days ( $1/\theta$ )                                   | 5.51        | 5.04      | 7.77      | 5.67        | 5.04      | 7.74     |
| Infectious period ( $1/\gamma + 1/\delta$ )                          | 18.41       | 14.51     | 26.75     | 15.54       | 14.22     | 25.88    |
| Transmission probability per sex act                                 | 0.50        | 0.39      | 0.66      | 0.49        | 0.45      | 0.81     |
| Number casual partners per day, very-high activity group             | 0.91        | 0.72      | 1.00      | 0.90        | 0.72      | 0.98     |
| Factor reducing transmission when in abstinence ( $w$ )              | 23%         | 17%       | 60%       | 20%         | 15%       | 30%      |
| Assortativeness mixing with main partners ( $\epsilon_M$ )           | 0.72        | 0.31      | 0.87      | 0.75        | 0.14      | 0.88     |
| Assortativeness mixing with casual partners ( $\epsilon_C$ )         | 0.85        | 0.66      | 0.89      | 0.75        | 0.20      | 0.89     |
| Vaccination rate before 25 July 2022                                 | 0.04%       | 0.03%     | 0.05%     | 0.04%       | 0.03%     | 0.05%    |
| Efficacy old vaccine ( $v_1 = \sigma_1$ )                            | 57%         | 50%       | 65%       | 56%         | 51%       | 65%      |
| Efficacy new vaccine ( $v_2 = \sigma_2$ )                            | 85%         | 80%       | 90%       | 82%         | 80%       | 90%      |
| Hospitalization rate, $\zeta$                                        | 2%          | 1%        | 2%        | 2%          | 1%        | 2%       |
| Days infectious not refraining from sex, before $T_2$                | 6.20        | 2.73      | 7.87      | 5.82        | 4.62      | 7.98     |
| Days infectious not refraining from sex, after $T_2$                 | 2.80        | 2.02      | 6.60      | 2.24        | 2.02      | 2.80     |
| Date of adaptations in July, $T_2$                                   | 8-7-2022    | 5-7-2022  | 14-7-2022 | 6-7-2022    | 5-7-2022  | 9-7-2022 |
| % reduction casual partners, low activity groups, after $T_2$        | 13%         | 0%        | 29%       | 11%         | 0%        | 28%      |
| % reduction casual partners, fairly-high activity group, after $T_2$ | 17%         | 1%        | 29%       | 14%         | 1%        | 29%      |
| % reduction casual partners, very-high activity group, after $T_2$   | 22%         | 2%        | 29%       | 22%         | 2%        | 29%      |

258

259 **Table S3.** Sensitivity analysis for the percentage of MSM vaccinated in the past via the old smallpox vaccination programme. Posterior distributions of uncertain model  
 260 parameters obtained from the fitting process for the scenario with adaptations in behaviour of MSM only in July 2022. Results shown are the medians and 95% credible  
 261 intervals, in a population of 250,000 MSM.

262

|                                                                      | Higher % vaccinated in group with highest level of sexual activity* |           |           | Higher % vaccinated in group with lowest level of sexual activity** |           |           |
|----------------------------------------------------------------------|---------------------------------------------------------------------|-----------|-----------|---------------------------------------------------------------------|-----------|-----------|
|                                                                      | Median                                                              | 95% range |           | Median                                                              | 95% range |           |
| Latent period, days ( $1/\theta$ )                                   | 5.67                                                                | 5.11      | 6.76      | 5.53                                                                | 5.02      | 6.92      |
| Infectious period ( $1/\gamma + 1/\delta$ )                          | 16.08                                                               | 14.48     | 26.54     | 17.61                                                               | 14.48     | 26.61     |
| Transmission probability per sex act                                 | 0.60                                                                | 0.47      | 0.80      | 0.42                                                                | 0.32      | 0.68      |
| Number casual partners per day, very-high activity group             | 0.90                                                                | 0.73      | 0.98      | 0.85                                                                | 0.73      | 0.99      |
| Factor reducing transmission when in abstinence ( $w$ )              | 21%                                                                 | 16%       | 41%       | 20%                                                                 | 16%       | 37%       |
| Assortativeness mixing with main partners ( $\epsilon_M$ )           | 0.75                                                                | 0.21      | 0.90      | 0.67                                                                | 0.10      | 0.88      |
| Assortativeness mixing with casual partners ( $\epsilon_C$ )         | 0.79                                                                | 0.27      | 0.90      | 0.82                                                                | 0.33      | 0.90      |
| Vaccination rate before 25 July 2022                                 | 0.04%                                                               | 0.03%     | 0.05%     | 0.04%                                                               | 0.03%     | 0.05%     |
| Efficacy old vaccine ( $v_1 = \sigma_1$ )                            | 59%                                                                 | 50%       | 65%       | 55%                                                                 | 51%       | 64%       |
| Efficacy new vaccine ( $v_2 = \sigma_2$ )                            | 84%                                                                 | 81%       | 89%       | 82%                                                                 | 80%       | 90%       |
| Hospitalization rate, $\zeta$                                        | 2%                                                                  | 1%        | 2%        | 2%                                                                  | 1%        | 2%        |
| Days infectious not refraining from sex, before $T_2$                | 6.31                                                                | 4.25      | 7.82      | 6.68                                                                | 3.80      | 7.98      |
| Days infectious not refraining from sex, after $T_2$                 | 2.41                                                                | 2.08      | 4.36      | 2.36                                                                | 2.01      | 4.24      |
| Date of adaptations in July, $T_2$                                   | 6-7-2022                                                            | 5-7-2022  | 11-7-2022 | 6-7-2022                                                            | 5-7-2022  | 10-7-2022 |
| % reduction casual partners, low activity groups, after $T_2$        | 16%                                                                 | 2%        | 29%       | 12%                                                                 | 1%        | 29%       |
| % reduction casual partners, fairly-high activity group, after $T_2$ | 20%                                                                 | 1%        | 30%       | 16%                                                                 | 3%        | 28%       |
| % reduction casual partners, very-high activity group, after $T_2$   | 23%                                                                 | 4%        | 29%       | 26%                                                                 | 5%        | 30%       |

263

264 \* The percentage vaccinated in the past in the group with very low, fairly low, fairly high, or very high level of sexual activity was 23%, 25%, 30%, 40%, respectively. This  
 265 results in a total of 25% being vaccinated in the total MSM population.

266 \*\* The percentage vaccinated in the past in the group with very low, fairly low, fairly high, or very high level of sexual activity was 29%, 25%, 15%, 10%, respectively. This  
 267 results in a total of 25% being vaccinated in the total MSM population.

268 **References**

- 269 1. Xiridou M, Heijne J, Adam P, Op de Coul E, Matser A, de Wit J, et al. How the Disruption in  
270 Sexually Transmitted Infection Care Due to the COVID-19 Pandemic Could Lead to Increased  
271 Sexually Transmitted Infection Transmission Among Men Who Have Sex With Men in The  
272 Netherlands: A Mathematical Modeling Study. *Sex Transm Dis.* 2022;49(2):145-53. doi:  
273 10.1097/olq.0000000000001551. PubMed PMID: 34475357.
- 274 2. Statistics Netherlands. The Netherlands in figures 2022 [3 July 2022]. Available from:  
275 <https://opendata.cbs.nl/#/CBS/en>.
- 276 3. National Institute of Public Health and the Environment (RIVM). Online National System of  
277 Registration of Infectious Diseases (OSIRIS): National Institute of Public Health and the Environment  
278 (RIVM); 2021 [Accessed: 13 December 2021]. Available from: [https://www.rivm.nl/sniv/handleiding-](https://www.rivm.nl/sniv/handleiding-osiris)  
279 [osiris](https://www.rivm.nl/sniv/handleiding-osiris).
- 280 4. Marcus U, Hickson F, Weatherburn P, Schmidt AJ. Estimating the size of the MSM  
281 populations for 38 European countries by calculating the survey-surveillance discrepancies (SSD)  
282 between self-reported new HIV diagnoses from the European MSM internet survey (EMIS) and  
283 surveillance-reported HIV diagnoses among MSM in 2009. *BMC Public Health.* 2013;13:919. Epub  
284 2013/10/04. doi: 10.1186/1471-2458-13-919. PubMed PMID: 24088198; PubMed Central PMCID:  
285 PMC3850943.
- 286 5. Rutgers NISSO Group. Sexual health in the Netherlands. Delft: Eburon; 2006.
- 287 6. Man Tot Man. Do this if you have monkeypox. [Accessed: 24 January 2023]. Available from:  
288 <https://www.mantotman.nl/en/do-this-if-you-have-monkeypox>.
- 289 7. Soa Aids Nederland. Uit de praktijk: 2 plekjes op de eikel, dat is toch geen monkeypox?  
290 Published online: 30 June 2022. Accessed 15 November 2022. Available from:  
291 [https://www.soa aids.nl/nl/professionals/themas/seksoa-magazine/uit-praktijk-2-plekjes-op-eikel-dat-](https://www.soa aids.nl/nl/professionals/themas/seksoa-magazine/uit-praktijk-2-plekjes-op-eikel-dat-is-toch-geen-monkeypox)  
292 [is-toch-geen-monkeypox](https://www.soa aids.nl/nl/professionals/themas/seksoa-magazine/uit-praktijk-2-plekjes-op-eikel-dat-is-toch-geen-monkeypox).



- 293 8. NOS Nieuws. In the Netherlands 167 persons diagnosed with monkeypox by now (original  
294 title: "In Nederland nu bij 167 mensen apenpokkenbesmetting vastgesteld"): NOS; 2022 [Accessed 15  
295 November 2022]. Available from: [https://nos.nl/artikel/2433610-in-nederland-nu-bij-167-mensen-  
apenpokkenbesmetting-vastgesteld](https://nos.nl/artikel/2433610-in-nederland-nu-bij-167-mensen-<br/>296 apenpokkenbesmetting-vastgesteld).
- 297 9. van Ewijk C, Miura F, van Rijckevorsel G, de Vries H, Welkers M, van den Berg O, et al.  
298 Monkeypox outbreak in the Netherlands in 2022: public health response, epidemiological and clinical  
299 characteristics of the first 1000 cases and protection of the first-generation smallpox vaccine.  
300 *Eurosurveillance*. 2023;28:2200772 Epub 23/3/2023.
- 301 10. Adam PCG, Op de Coul ELM, Bos H, Zantkuijl P, Zuillhof W, Xiridou M, et al. Monkeypox-  
302 related changes in behaviour among MSM in the Netherlands and their impact on the monkeypox  
303 outbreak: using behavioural research and theorising to inform the monkeypox response. Utrecht  
304 University and Institute for Prevention and Social Research, Utrecht, the Netherlands, 2022.
- 305 11. Soa Aids Nederland. Samenwerking zorg en horeca onmisbaar in aanpak monkeypox-uitbraak  
306 [Accessed 15 November 2022]. Available from: [https://www.soaaid.nl/nl/professionals/  
actueel/nieuwsbericht/samenwerking-zorg-horeca-onmisbaar-in-aanpak-monkeypox-uitbraak](https://www.soaaid.nl/nl/professionals/<br/>307 actueel/nieuwsbericht/samenwerking-zorg-horeca-onmisbaar-in-aanpak-monkeypox-uitbraak).
- 308 12. McKay KDB, R.J.; Conover, W.J. A comparison of three methods for selecting values of input  
309 variable in the analysis of output from a computer code. *Technometrics* 1979;21:239-45.
- 310 13. Adam P, Op de Coul E, Zuillhof W, Zantkuijl P, den Daas C, de Wit J. Changes in MSM's  
311 sexual activity, PrEP use, and access to HIV/STI testing during and after the first Dutch COVID-19  
312 lockdown. *Sexually Transmitted Infections*. 2021;97(Supplement 1):A26.
- 313 14. Adam PCG, Zuillhof W, Den Daas C, Op de Coul E, Zantkuijl P, Paolucci J, et al. Reduction  
314 in the magnitude of COVID-19-associated changes in sexual activity and disruption in HIV/STI  
315 testing or PrEP use among MSM responding to the 2nd COVID-19, sex and intimacy survey.  
316 National Conference on HIV; 23 November 2021; Virtual2021.

317
